# Supplementary material for: Transient RNA structures cause aberrant influenza virus replication and innate immune activation
Source: PubMed Central journal article supplement (PMC9462681; doi:10.1126/sciadv.abp8655), 2022-09-09
Supplement: sciadv.abp8655_sm.pdf [file sciadv.abp8655_sm.pdf]

Supplementary Materials for  
**Transient RNA structures cause aberrant influenza virus replication and  
innate immune activation**

Hollie French *et al.*

Corresponding author: Aartjan J.W. te Velthuis, [aj.te.velthuis@princeton.edu](mailto:aj.te.velthuis@princeton.edu)

*Sci. Adv.* **8**, eabp8655 (2022)  
DOI: 10.1126/sciadv.abp8655

**This PDF file includes:**

Figs. S1 to S12  
Tables S1 to S3  
Files S1 to S4  
Supplemental Script

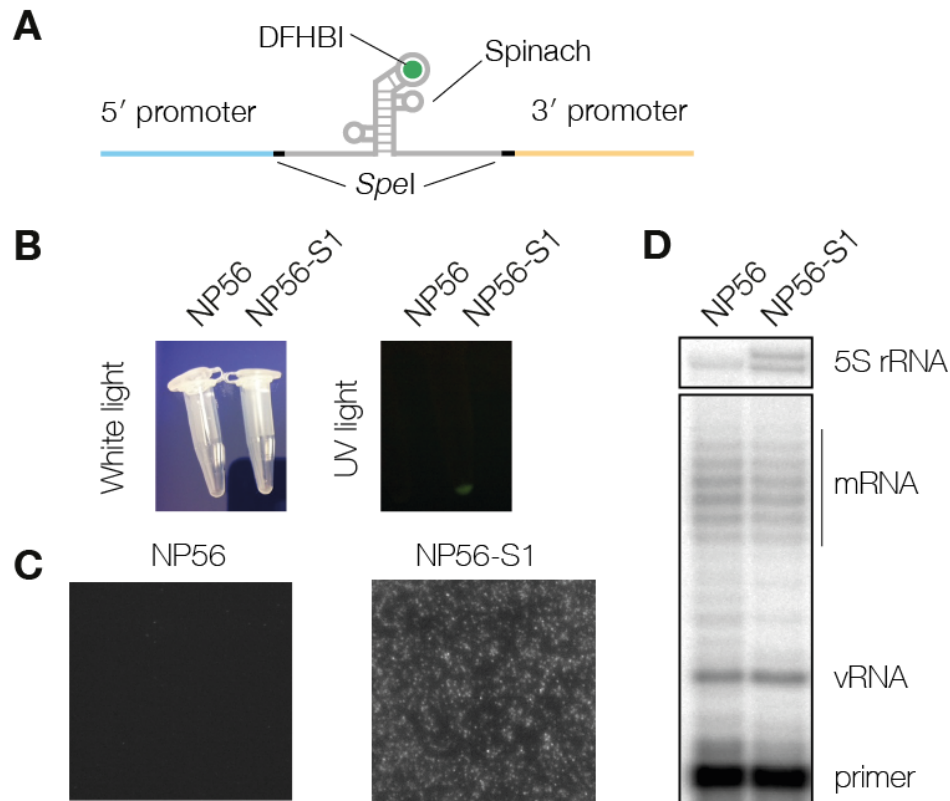

**Figure S1.** Effect of a single spinach aptamer on mvRNA replication. A) To rule out that a single RNA structure upstream of the RNA polymerase reduces activity, we engineered the NP56 mvRNA template and inserted the RNA aptamer Spinach, creating NP56-S1. B) A Spinach-containing mvRNAs generated in vitro demonstrated fluorescence after addition of DFHBI relative to the 56-nt control mvRNA, confirming that the aptamer folds properly in the context of the IAV promoter sequence. C) TIRF microscopy image of a 56-nt mvRNA or Spinach-containing mvRNA generated in vitro in the presence of DFHBI. D) After transfection of plasmids encoding the Spinach-containing mvRNA NP56-S1 into HEK293T cells and analysis of the RNA produced using primer extension, no difference in replication was observed relative to our NP56 control mvRNA.

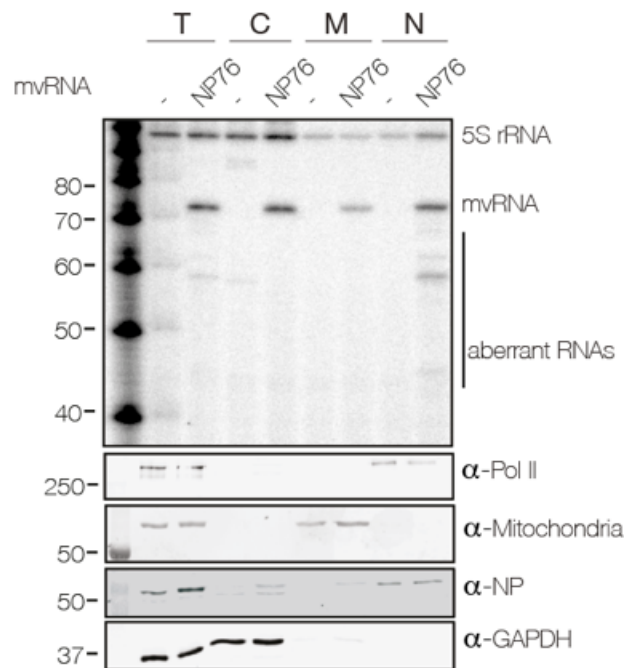

**Figure S2.** Fractionation of HEK 293T cells transfected with IAV RNA polymerase and a 76 nt-long segment 5-derived mvRNA. Top panel shows primer extension analysis of RNA extracted from fractions. Bottom four panels show western blot analysis. For each lane, comparable amounts were loaded.

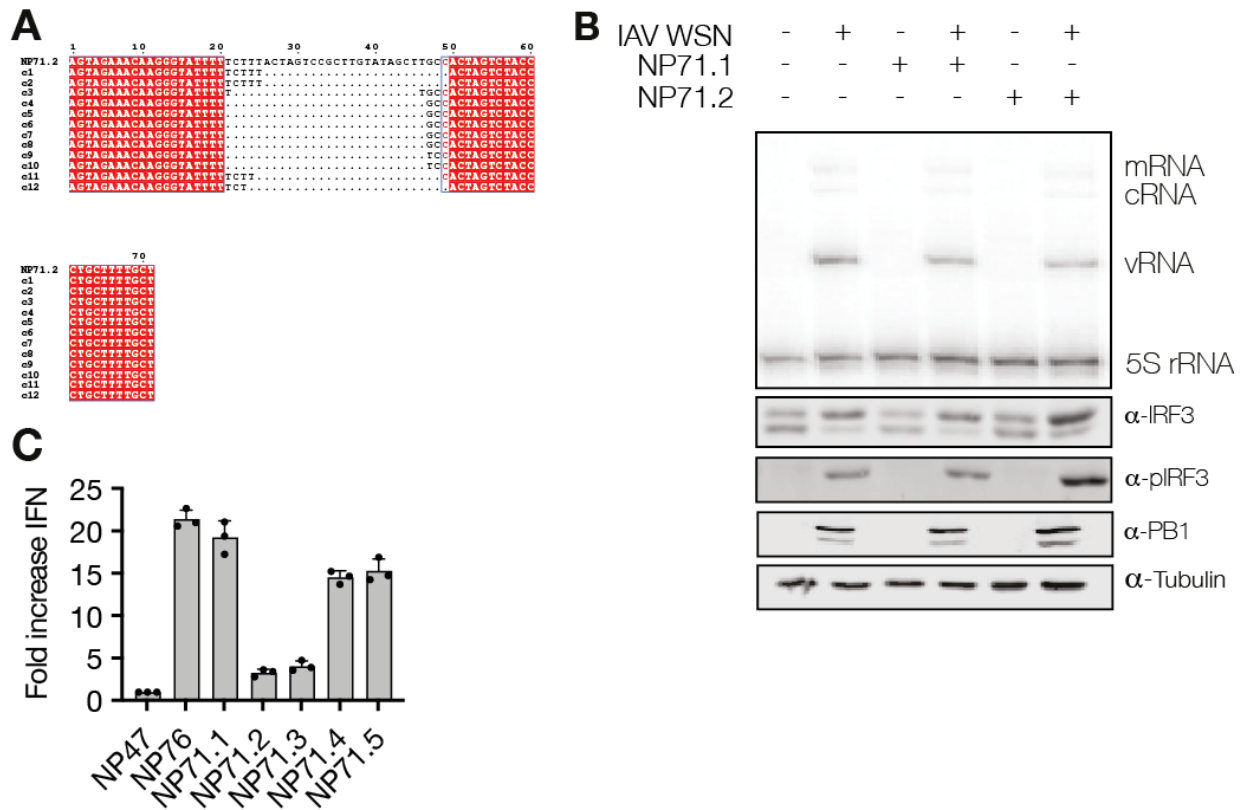

**Figure S3.** Aberrant RNA sequences, effect of exogenous mvRNAs on infection, and retransfection of total RNA. A) Alignment of aberrant RNA products isolated from in vitro replication assays. B) IFN- $\beta$  promoter activity induced by the retransfection of total RNA isolated from HEK 293T cells transfected with plasmids expressing segment 5-derived mvRNAs and the viral RNA polymerase subunits. Luciferase signal was normalized to the NP47 mvRNA, which does not trigger innate immune responses. E) Induction of IRF3 phosphorylation by pre-transfected, exogenous mvRNAs during infection with IAV A/WSN/33 (H1N1). mvRNA amplification could not be detected by primer extension, likely because exogenous templates poorly compete with endogenous viral RNAs for replication.

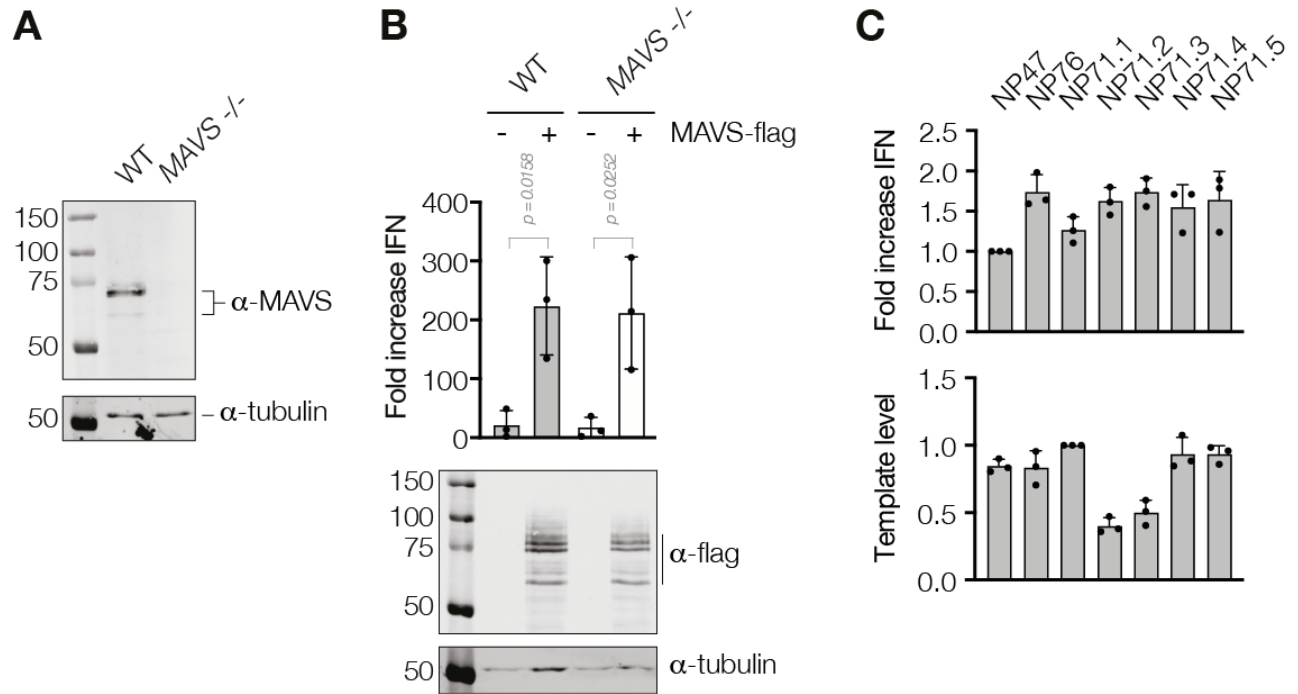

**Figure S4.** Characterization of *MAVS*<sup>-/-</sup> HEK 293 cells and mvRNA replication in *MAVS*<sup>-/-</sup> HEK 293 cells. A) Western blot analysis of MAVS expression in wildtype or *MAVS*<sup>-/-</sup> HEK 293 cells. B) IFN- $\beta$  promoter activity in wildtype or *MAVS*<sup>-/-</sup> HEK 293 cells following transfection of a plasmid expressing MAVS-flag. Bottom panel shows western blot of MAVS-flag expression. C) IFN- $\beta$  promoter activity of HEK 293 *MAVS*<sup>-/-</sup> cells expressing mvRNAs NP71.1-NP71.5, and primer extension analysis of mvRNA NP71.1-NP71.5 replication in HEK 293 *MAVS*<sup>-/-</sup> cells. P-values were computed using student t-test.

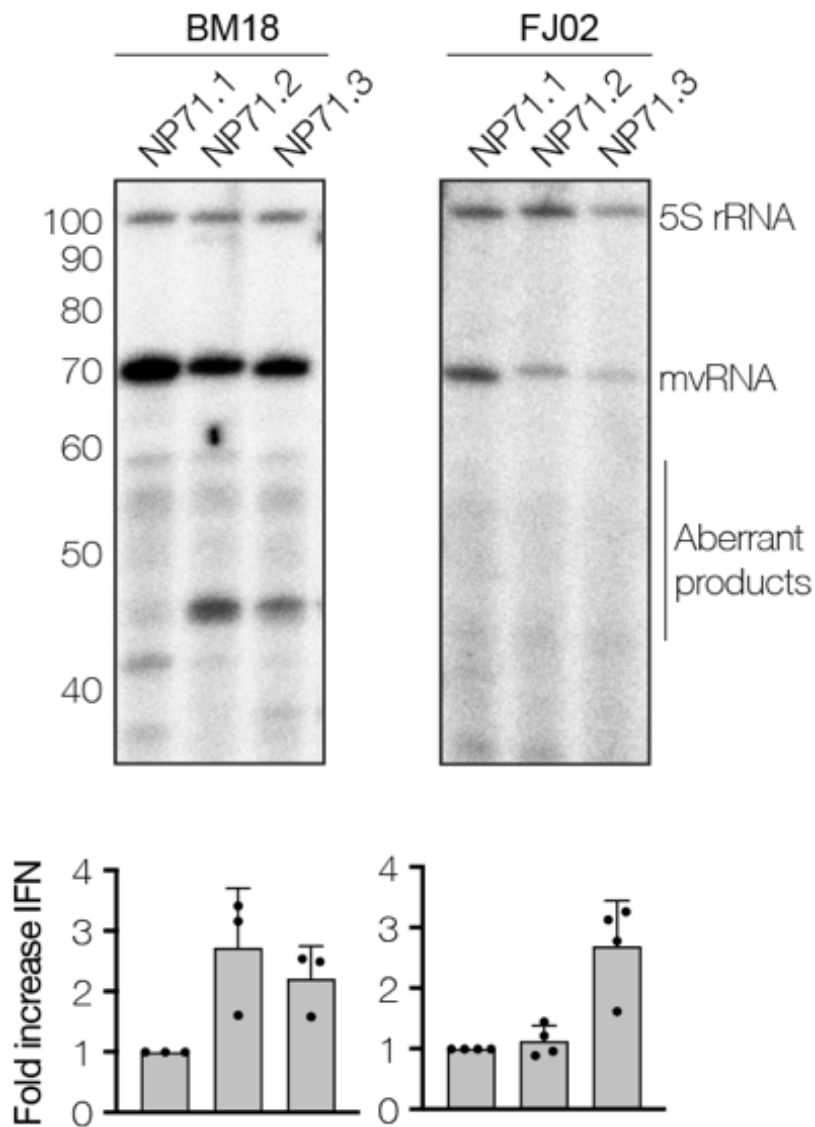

**Figure S5.** Replication of model mvRNAs in HEK 293T cells by the IAV A/Brevig Mission/1/18 (BM18) or A/duck/Fujian/01/02 (FJ02) RNA polymerases. The ability of these reactions to induce IFN- $\beta$  promoter activity was analyzed using a luciferase reporter assay.

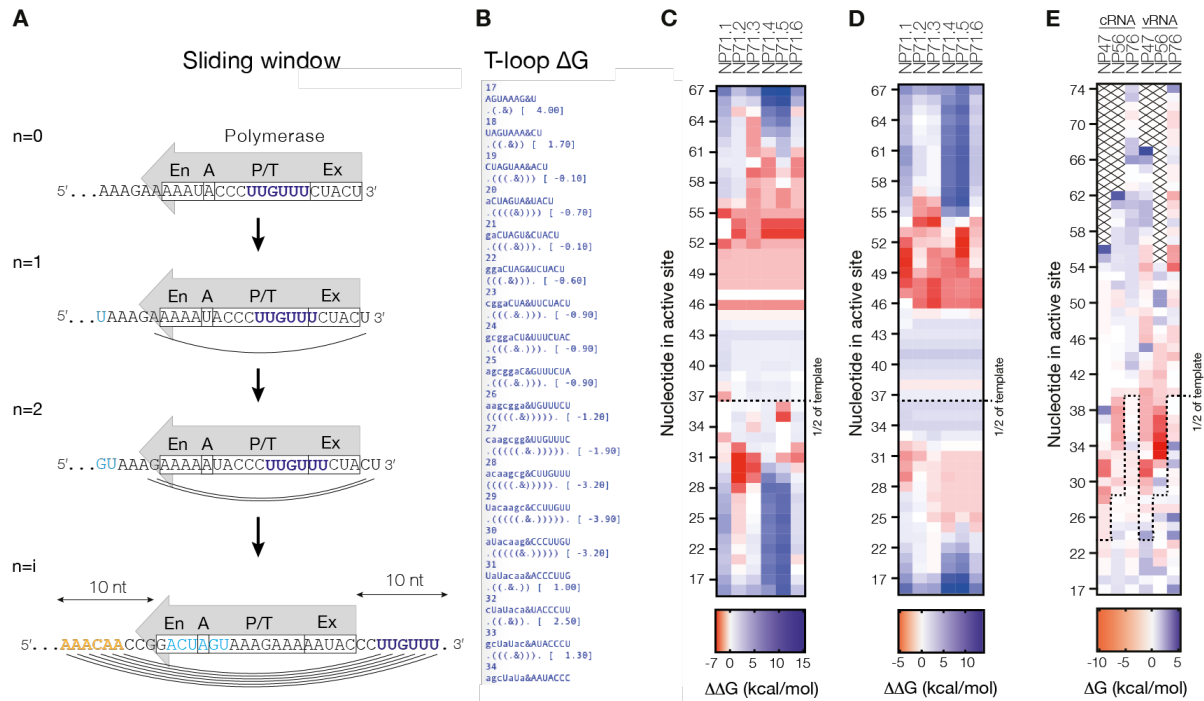

**Figure S6.** Sliding-window analysis of the free energy ( $\Delta G$ ) of transient secondary RNA structure formation near the influenza A virus RNA polymerase. A) To calculate the  $\Delta G$  for a t-loop, 10 nt on either side of the polymerase were allowed to fold using the duplex-fold algorithm of the ViennaRNA package. To calculate the  $\Delta G$  for alternative structures, cofold of the ViennaRNA package was used. The  $\Delta\Delta G$  for the likelihood of t-loop formation was calculated by subtracting the upstream and downstream  $\Delta G$  values from the t-loop  $\Delta G$  value. B) Example of Python script output. C)  $\Delta\Delta G$  values for positive sense 71-nt long mvRNA templates. D)  $\Delta\Delta G$  values for negative sense 71-nt long mvRNA templates. E) t-loop  $\Delta G$  values for positive sense and negative sense NP47, NP56 and NP76 mvRNA templates.

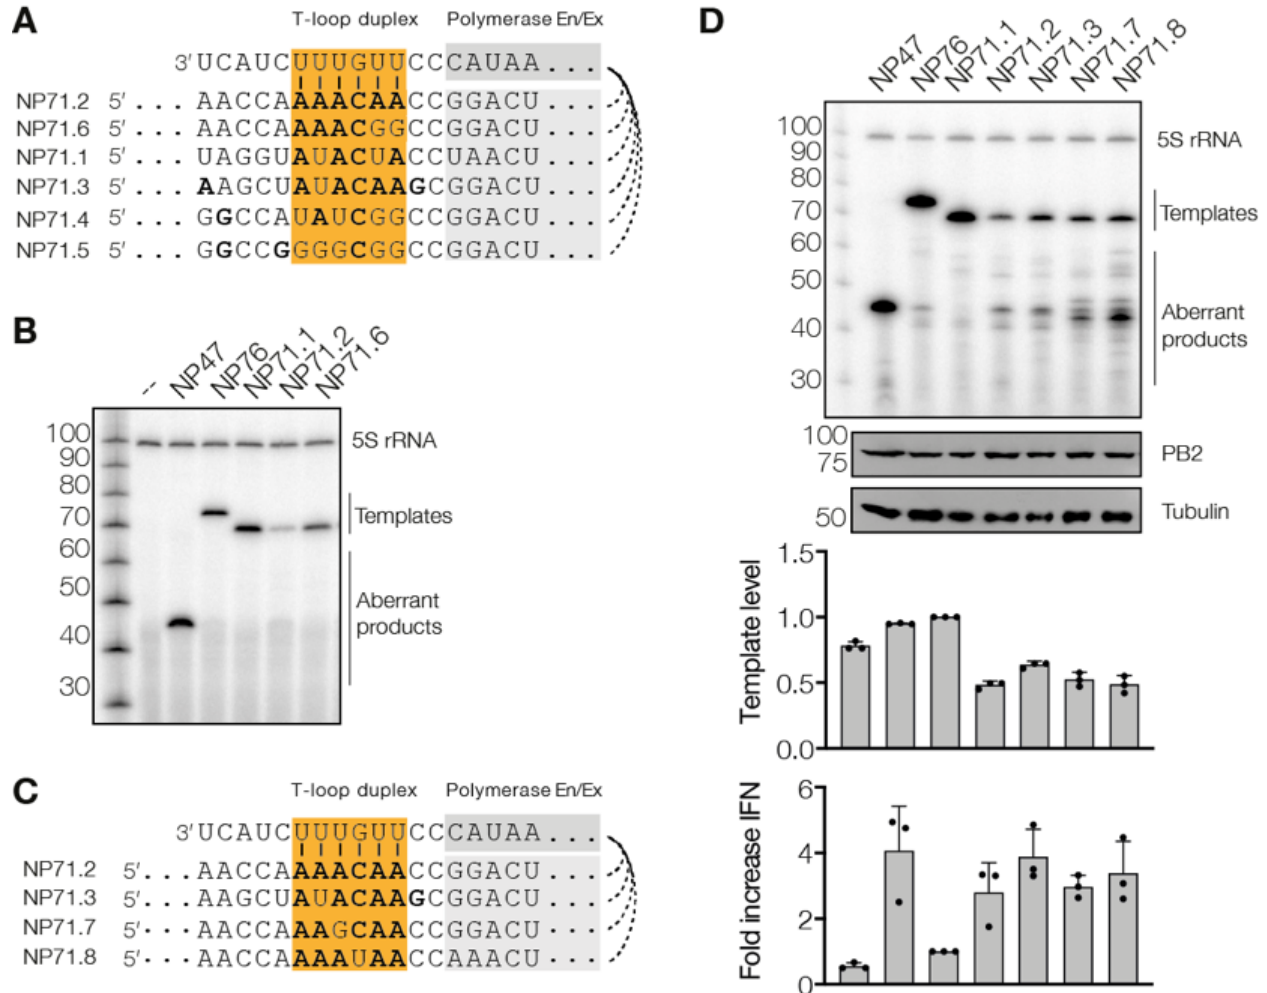

**Figure S7.** Replication of engineered mRNAs and their ability to induce IFN- $\beta$  promoter activity. A) Alignment of t-loops (shaded orange) in NP71 mVRNA templates. Location of RNA polymerase entry (En) and exit (Ex) channel is shaded gray. B) Primer extension analysis of RNA extracted from HEK 293T cells expressing NP71 mVRNA templates. C) Alignment of t-loops (shaded orange) of additional NP71 mVRNA templates. Location of RNA polymerase entry and exit channel is shaded gray. D) Primer extension analysis of RNA extracted from HEK 293T cells expressing NP71 mVRNA templates. Second and third panel show western blot analysis. Top graph shows quantification of mVRNA template level, while bottom graph shows IFN- $\beta$  promoter activity analysis using a luciferase reporter.



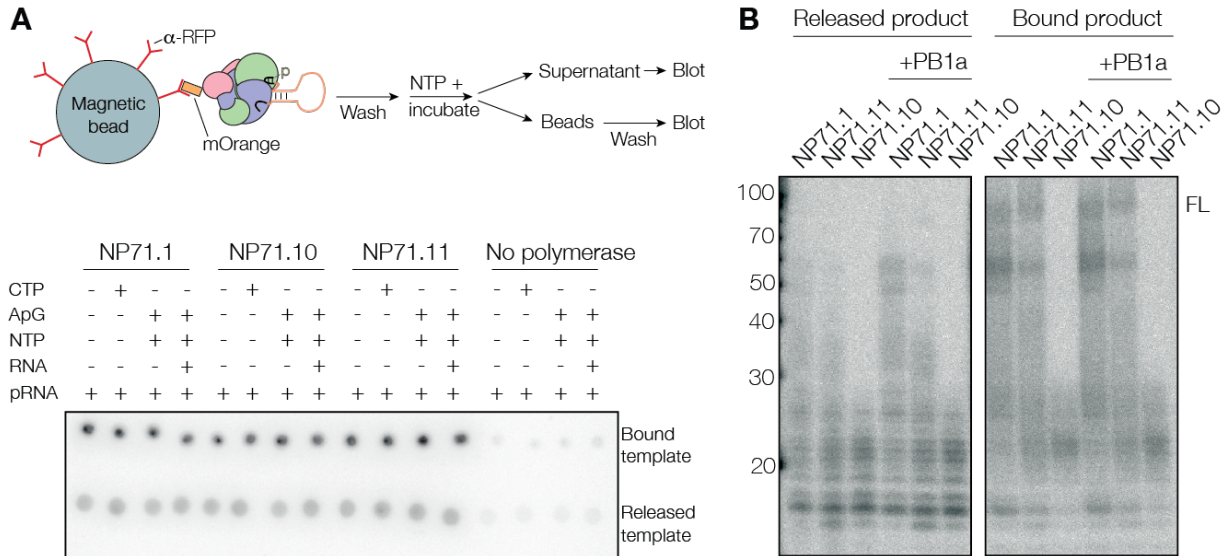

**Figure S8.** Analysis of IAV RNA polymerase template binding and release on different mvRNA templates in vitro. A) Binding of radiolabeled RNA templates by mOrange-tagged, immobilized IAV RNA polymerase in the absence and presence of ApG and NTPs. B) Binding of radiolabeled RNA products by mOrange-tagged, immobilized IAV RNA polymerase in the absence and presence of free inactive IAV RNA polymerase (PB1a).

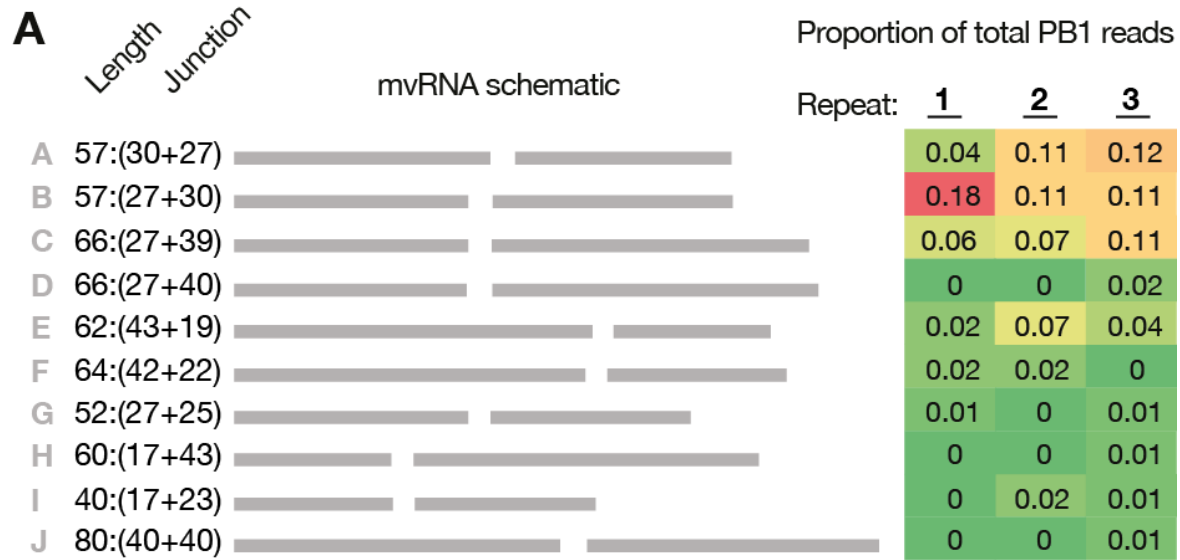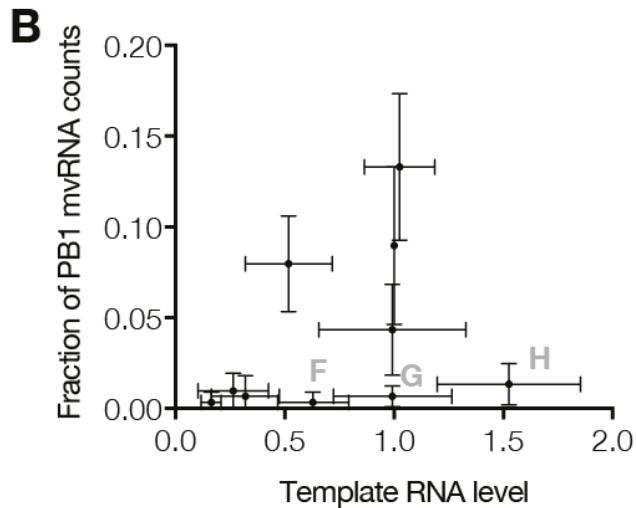

**Figure S9.** Selection of segment 2 mvRNAs. A) Segment 2 mvRNA sizes and abundance in three next generation sequencing experiments. B) Relation between mvRNA level in transfection assay and mvRNA read counts in next generation sequencing. The mvRNAs F, G and H are indicated.

**A**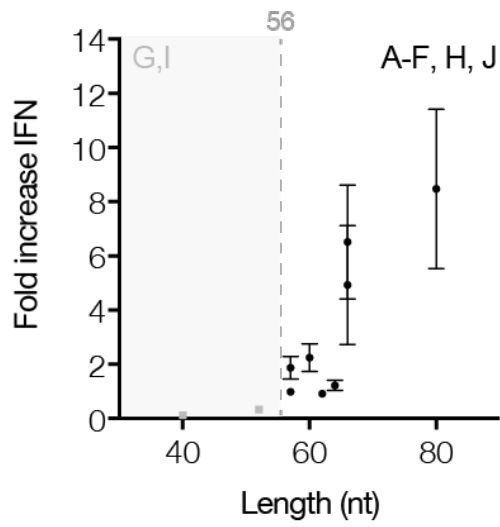**B**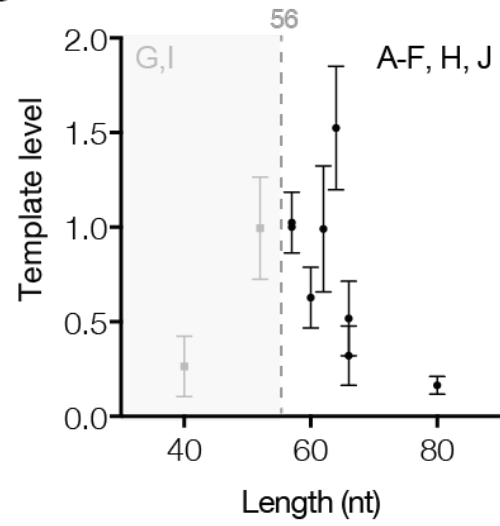

**Figure S10.** Relation between the A) mvRNA template length and the IFN- $\beta$  promoter activity induction, or B) the mvRNA template length and mvRNA replication.

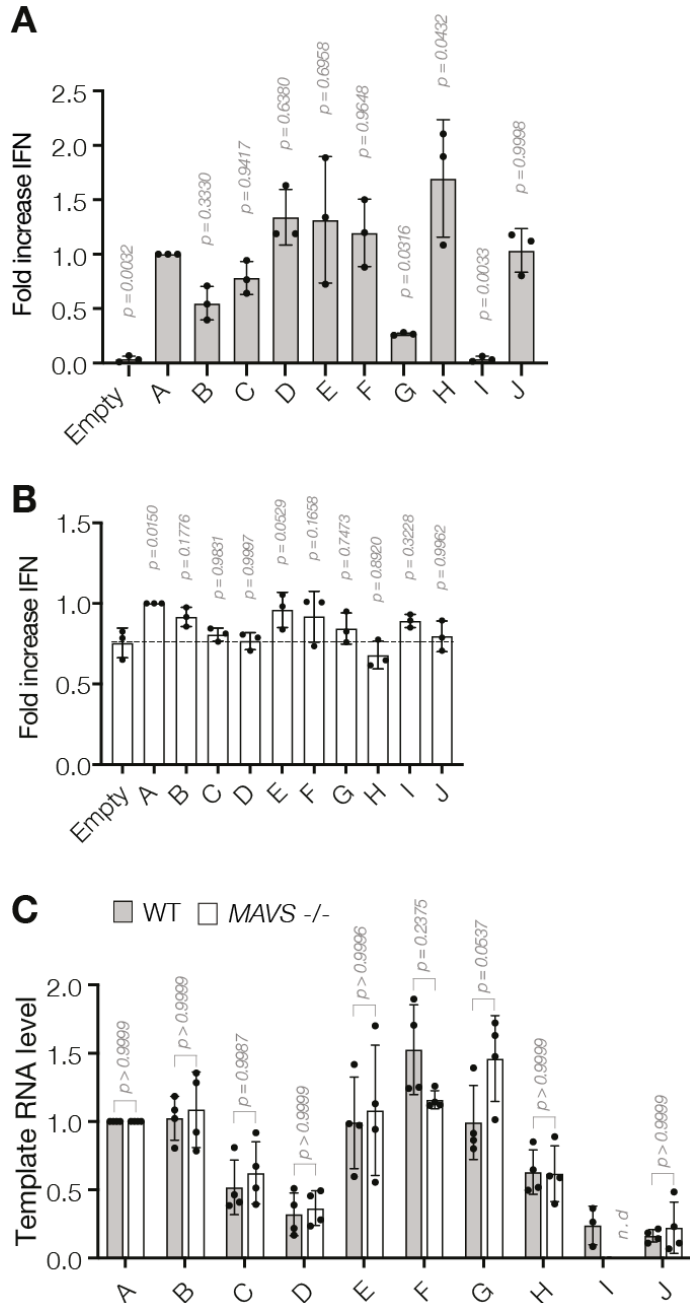

**Figure S11.** Segment 2 mvRNA replication in *MAVS<sup>-/-</sup>* HEK 293 cells. A) IFN- $\beta$  promoter activity measured after retransfection of total RNA extracted from HEK 293T cells expressing segment 2 mvRNAs into HEK 293T cells. B) IFN- $\beta$  promoter activity induced by expression of segment 2 mvRNAs in *MAVS<sup>-/-</sup>* HEK 293 cells. C) Primer extension analysis of segment 2 mvRNAs levels in wildtype and *MAVS<sup>-/-</sup>* HEK 293 cells. P-values were computed using one-way ANOVA with multiple-corrections relative to template A or the empty plasmid control.

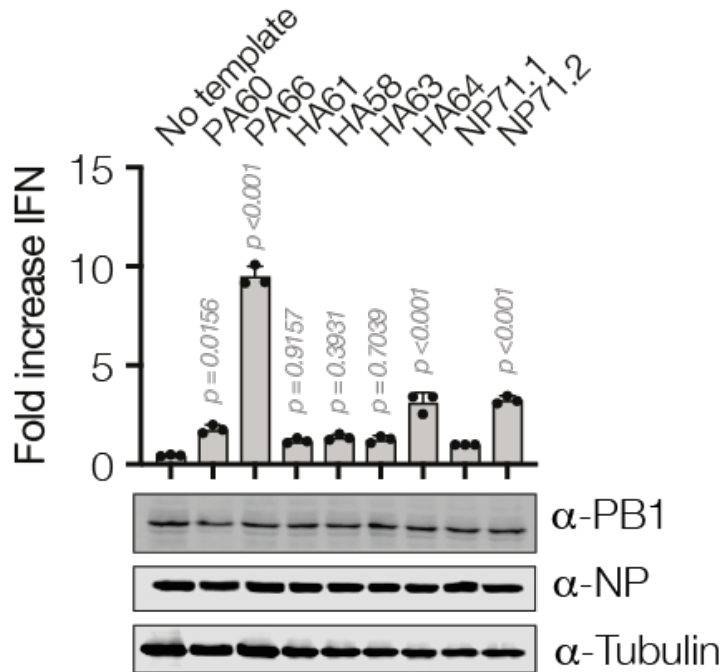

**Figure S12.** Induction of IFN beta promoter activity by segment 3 and 4 mvRNAs. P-values were computed using one-way ANOVA with multiple-corrections relative to the NP71.1 mvRNA template.

**Table S1.** Sequences of mvRNA templates used.

| <b>Name</b> | <b>Internal lab reference</b> | <b>Sequence 5' and 3' (vRNA)</b>                                                 |
|-------------|-------------------------------|----------------------------------------------------------------------------------|
| NP71.1      | GC33                          | AGUAGAAACAAGGGUAUUUUUCUUUACUAGUUAGGUAGUAUA<br>CCUAGUAACUAGUCUACCCUGCUUUUGCU      |
| NP71.2      | GC50.1                        | AGUAGAAACAAGGGUAUUUUUCUUUACUAGUCCGGUUGUUU<br>UGGUUGCCACUAGUCUACCCUGCUUUUGCU      |
| NP71.3      | GC50.2                        | AGUAGAAACAAGGGUAUUUUUCUUUACUAGUCCGCUUGUAU<br>AGCUUGCCACUAGUCUACCCUGCUUUUGCU      |
| NP71.4      | GC67                          | AGUAGAAACAAGGGUAUUUUUCUUUACUAGUCCGGCCGAUA<br>UGGCCGCCACUAGUCUACCCUGCUUUUGCU      |
| NP71.5      | GC83                          | AGUAGAAACAAGGGUAUUUUUCUUUACUAGUCCGGCCGCC<br>CGGCCGCCACUAGUCUACCCUGCUUUUGCU       |
| NP71.6      | GC50.9                        | AGUAGAAACAAGGGUAUUUUUCUUUACUAGUCCGGCCGUUU<br>UGGUUGCCACUAGUCUACCCUGCUUUUGCU      |
| NP71.7      | GC50.3                        | AGUAGAAACAAGGGUAUUUUUCUUUACUAGUCCGGUUCUUU<br>UGGUUGCCACUAGUCUACCCUGCUUUUGCU      |
| NP71.8      | GC50.4                        | AGUAGAAACAAGGGUAUUUUUCUUUACUAGUCCGGUUGCUU<br>UGGUUGCCACUAGUCUACCCUGCUUUUGCU      |
| NP47        | NP47                          | AGUAGAAACAAGGGUAUUUUUCUUUACUAGUCUACCCUGCU<br>UUUGCU                              |
| NP56        | NP56                          | AGUAGAAACAAGGGUAUUUUUCUUUCUCGAGCGUACUAGUC<br>UACCCUGCUUUUGCU                     |
| NP76        | NP76                          | AGUAGAAACAAGGGUAUUUUUCUUUACUAGUGAUUUCGAUG<br>UCACUCUGUGAGUGAUUAUCUACCCUGCUUUUGCU |
| NP71.10     | GC50_13                       | AGUAGAAACAAGGGUAUUUUUCUUUACUAGUGGCAGCAAAG<br>CAGGGUAACUAGUCUACCCUGCUUUUGCU       |
| NP71.11     | GC50_15                       | AGUAGAAACAAGGGUAUUUUUCUUUACUAGUGGCAGCAAAG<br>CACCCAUACUAGUCUACCCUGCUUUUGCU       |
| NP71.12     | GC50_16                       | AGUAGAAACAAGGGUAUUUUUCUUUACUAGUGGCUCUAAAAG<br>CACCCAUACUAGUCUACCCUGCUUUUGCU      |

**Table S2.** Cloned PB1 WSN mvRNAs.

| <b>Name</b> | <b>Length (nt)</b> | <b>Sequence 5' and 3' (vRNA)</b>                                                     |
|-------------|--------------------|--------------------------------------------------------------------------------------|
| PB1 A       | 57                 | AGUAGAAACAAGGCAUUUUUUCAUGAAAUCCAUUCAAAUGGU<br>UUGCCUGCUUUCGCU                        |
| PB1 B       | 57                 | AGUAGAAACAAGGCAUUUUUUCAUGAAGGACAUUCAAAUGGU<br>UUGCCUGCUUUCGCU                        |
| PB1 C       | 66                 | AGUAGAAACAAGGCAUUUUUUCAUGAAGGACAAGCUAAACAU<br>UCAAUGGUUUGCCUGCUUUCGCU                |
| PB1 D       | 67                 | AGUAGAAACAAGGCAUUUUUUCAUGAAGGACAAGCUAAAUCA<br>UUCAAAUGGUUUGCCUGCUUUCGCU              |
| PB1 E       | 62                 | AGUAGAAACAAGGCAUUUUAAGUCGGAUUGACAUCCAUUCAA<br>AUGGUUUGCCUGCUUUCGCU                   |
| PB1 F       | 64                 | AGUAGAAACAAGGCAUUUUUUCAGUCGGAUUGACAUCCAUUC<br>AAAUGGUUUGCCUGCUUUCGCU                 |
| PB1 G       | 52                 | AGUAGAAACAAGGCAUUUUUUCAUGCAUUCAAAUGGUUUGCC<br>UGCUUUCGCU                             |
| PB1 H       | 60                 | AGUAGAAACAAGGCAUUUUUUCAUGAAGGACAAGCUAAAUUC<br>AGUUUGCCUGCUUUCGCU                     |
| PB1 I       | 40                 | AGUAGAAACAAGGCAUUUUUUCAGUUUGCCUGCUUUCGCU                                             |
| PB1 J       | 80                 | AGUAGAAACAAGGCAUUUUUUCAUGAAGGACAAGCUAAAUUC<br>GGAUUGACAUCCAUUCAAAUGGUUUGCCUGCUUUCGCU |

**Table S3.** Cloned mvRNAs based on t-loop analysis.

| <b>Name</b> | <b>Sequence 5' and 3' (vRNA)</b>                                        |
|-------------|-------------------------------------------------------------------------|
| PA66        | AGUAGAAACAAGGUACUUUUUUGGACAGUAUGGAUAGCACAUUUUGAAU<br>CAGUACCUGCUUUUCGCU |
| PA60        | AGUAGAAACAAGGUACUUUUUUGGACAGUAUGCCAUUUUUGAAUCAGUAC<br>CUGCUUUUCGCU      |
| HA61        | AGUAGAAACAAGGGUGUUUUUCCUUAUAUUUCUGAAAUCCUAAUCUCC<br>CCUGCUUUUUGCU       |
| HA58        | AGUAGAAACAAGGGUGUUUUUCCUUAUAUUUCUGAAAUCCUAAUCCCCU<br>GCUUUUUGCU         |
| HA63        | AGUAGAAACAAGGGUGUUUUUCCUUAUAUUUCUGAAAUGUUUUUAUUUU<br>CCCCUGCUUUUUGCU    |
| HA64        | AGUAGAAACAAGGGUGUUUUUCCUUAUAUUUCUGAAAUCCUAAUCUCAU<br>UCCCCUGCUUUUUGCU   |



## Supplemental Fasta file 1. WSN mvRNA sequences.

>WSN\_NP\_61  
AGCAAAAAGCAGGGTAGATAATCACTCACAGAGTGACATAGAAAAATACCCTTGTTTCTACT

>WSN\_PB1\_57  
AGCGAAAAGCAGGCAAACCATTTGAATGGATTTTCATGAAAAAATGCCTTGTTTCTACT

>WSN\_PB1\_57  
AGCGAAAAGCAGGCAAACCATTTGAATGTCTTCATGAAAAAATGCCTTGTTTCTACT

>WSN\_PB1\_66  
AGCGAAAAGCAGGCAAACCATTTGAATGTTTAGCTTGTCTTCATGAAAAAATGCCTTGTTTCTACT

>WSN\_NP\_65  
AGCAAAAAGCAGGGTAGATAATCACTCACAGAGTGACATCTAAAGAAAAATACCCTTGTTTCTACT

>WSN\_HA\_44  
AGCAAAAAGCAGGGGAATATAAGGAAAAACACCCTTGTTTCTACT

>WSN\_NA\_70  
AGCAAAAAGCAGGAGTTTAAATGAATCCAAACCTGACAAGTAGTTTGTTCAAAAAATCCTTGTTTCTACT

>WSN\_PB1\_62  
AGCGAAAAGCAGGCAAACCATTTGAATAGCTTGTCTTCATGAAAAAATGCCTTGTTTCTACT

>WSN\_NP\_70  
AGCAAAAAGCAGGGTAGATAATCACTCACAGAGTGACATCGAAATTAAGAAAAAATACCCTTGTTTCTACT

>WSN\_PB1\_64  
AGCGAAAAGCAGGCAAACCATTTGAATGGATGTCAATCCGACTTAAAAAATGCCTTGTTTCTACT

>WSN\_PB1\_69  
AGCGAAAAGCAGGCAAACCATTTGAATGGATGTTAGCTTGTCTTCATGAAAAAATGCCTTGTTTCTACT

>WSN\_NA\_69  
AGCAAAAAGCAGGAGTTTAAATGAATCCAAACCAGAAAGTAGTTTGTTCAAAAAATCCTTGTTTCTACT

>WSN\_PB1\_62  
AGCGAAAAGCAGGCAAACCATTTGAATGGATGTCAATCCGACTTAAATGCCTTGTTTCTACT

>WSN\_PB1\_68  
AGCGAAAAGCAGGCAAACCATTTGAATGGATGTCAATCCGACTTCATGAAAAAATGCCTTGTTTCTACT

>WSN\_HA\_60  
AGCAAAAAGCAGGGGAAATTAGGATTTAGAAATATAAGGAAAAACACCCTTGTTTCTACT

>WSN\_PB1\_68  
AGCGAAAAGCAGGCAAACCATTTGAATGGATGTCAATCCTCCTTCATGAAAAAATGCCTTGTTTCTACT

>WSN\_PB1\_49  
AGCGAAAAGCAGGCAAACCATTTGAATTGAAAAAATGCCTTGTTTCTACT

>WSN\_PB1\_56  
AGCGAAAAGCAGGCAAACCTTTAGCTTGTCTTCATGAAAAAATGCCTTGTTTCTACT

>WSN\_PB2\_60  
AGCGAAAAGCAGGTCAATTATATTCAATATCGAATAGTTTAAAAACGACCTTGTTTCTACT

>WSN\_PB1\_60  
AGCGAAAAGCAGGCAAACCATTTGAATGGATGTCAATATGAAAAAATGCCTTGTTTCTACT

>WSN\_NP\_74  
AGCAAAAAGCAGGGTAGATAATCACTCACAGAGTGACATCTACGACAATTAAGAAAAAATACCCTTGTTTCTACT

>WSN\_NA\_73  
AGCAAAAAGCAGGAGTTTAAATGAATCCAAACCAGAAAACAAGTAGTTTGTTCAAAAAATCCTTGTTTCTACT

>WSN\_NA\_62  
AGCAAAAAGCAGGAGTTTAAATGAATCCAAACTAGTTTGTTCAAAAAATCCTTGTTTCTACT

>WSN\_NA\_63  
AGCAAAAAGCAGGAGTTTAAACACCATTGACAAGTAGTTTGTTCAAAAAATCCTTGTTTCTACT

>WSN\_PB2\_55  
AGCGAAAAGCAGGTCAATTATATTCCGAATAGTTTAAAAACGACCTTGTTTCTACT

>WSN\_PB1\_44  
AGCGAAAAGCAGGCAAACCATATGAAAAAATGCCTTGTTTCTACT

>WSN\_PA\_64  
AGCGAAAAGCAGGTACTGATTCAAATTGCTATCCATACTGTCCAAAAAAGTACCTTGTTTCTACT

>WSN\_NP\_70  
AGCAAAAAGCAGGGTAGATAATCACTCACAGAGTGACATCGAAATCATAGAAAAAATACCCTTGTTTCTACT

>WSN\_HA\_46  
AGCAAAAAGCAGGGGAAAAATAAAAAAGAAAAACACCCTTGTTTCTACT

>WSN\_HA\_61  
AGCAAAAAGCAGGGGAAAAATAAGATTTTCAGAAATATAAGAAAAACACCCTTGTTTCTACT

>WSN\_PB1\_65  
AGCGAAAAGCAGGCAAACCATTTGAATGGATGTCAATCCGACTTAAAAAATGCCTTGTTTCTACT

>WSN\_PB1\_61  
AGCGAAAAGCAGGCAAACCATTTGAATGG TGTCTTCATGAAAAAATGCCTTGTTTCTACT

>WSN\_PB1\_67  
AGCGAAAAGCAGGCAAACCATTTGAATGATTTAGCTTGTCTTCATGAAAAAATGCCTTGTTTCTACT

>WSN\_PB1\_60  
AGCGAAAAGCAGGCAAACCATTTGTAGCTTGTCTTCATGAAAAAATGCCTTGTTTCTACT

>WSN\_PB1\_64

AGCGAAAGCAGGCAAACCATGTGAATTTAGCTTGTCTTCATGAAAAATGCCTTGTTTCTACT  
>WSN\_PA\_66  
AGCGAAAGCAGGTACTGATTTACTATTTGCTATCCATACTGTCCAAAAAGTACCTTGTTTCTACT  
>WSN\_NP\_69  
AGCAAAAAGCAGGGTAGATAATCACTCACAGAGTGACATCGAAATCATGGCAAATACCCTTGTTTCTACT  
>WSN\_NP\_70  
AGCAAAAAGCAGGGTAGATAATCACTCACAGAGTGACATCGAAATCATGGCAAATACCCTTGTTTCTACT  
>WSN\_NP\_66  
AGCAAAAAGCAGGGTAGATAATCACTCACAGAGTGACATCTTAAAGAAAAATACCCTTGTTTCTACT  
>WSN\_NP\_64  
AGCAAAAAGCAGGGTAGATAATCACTCACAGAGTGACATTAAGAAAAATACCCTTGTTTCTACT  
>WSN\_NP\_57  
AGCAAAAAGCAGGGTAGATAATCACTCACAGAGTGACAAAAATACCCTTGTTTCTACT  
>WSN\_NP\_59  
AGCAAAAAGCAGGGTAGATAATCACTCACAGAGTTAAAGAAAAATACCCTTGTTTCTACT  
>WSN\_NP\_55  
AGCAAAAAGCAGGGTAGATAATCACTCACAGAGAGAAAAATACCCTTGTTTCTACT  
>WSN\_NA\_64  
AGCAAAAAGCAGGAGTTTAAATGAATCCAACCATAGTTTGTTCAAAAACTCCTTGTTTCTACT  
>WSN\_NA\_71  
AGCAAAAAGCAGGAGTTTAAATGAATCCAACCATGACAAGTAGTTTGTTCAAAAACTCCTTGTTTCTACT  
>WSN\_HA\_64  
AGCAAAAAGCAGGGGAATGAGATTAGGATTTAGAAATATAAGGAAAAACACCCTTGTTTCTACT  
>WSN\_PB2\_62  
AGCGAAAGCAGGTCAATTATATTCAATATGGAGAATAGTTTAAAAACGACCTTGTTTCTACT  
>WSN\_PB2\_57  
AGCGAAAGCAGGTCAATTATATTCAATATGTAGTTTAAAAACGACCTTGTTTCTACT  
>WSN\_PB2\_48  
AGCGAAAGCAGGTCAATTATATTCAATATAAAAAACGACCTTGTTTCTACT  
>WSN\_PB2\_54  
AGCGAAAGCAGGTCAATTATAGTGAATAGTTTAAAAACGACCTTGTTTCTACT  
>WSN\_PB2\_49  
AGCGAAAGCAGGTCAATTAGAATAGTTTAAAAACGACCTTGTTTCTACT  
>WSN\_PB2\_58  
AGCGAAAGCAGGTCAATCAATTAGTGTGAATAGTTTAAAAACGACCTTGTTTCTACT  
>WSN\_PB1\_68  
AGCGAAAGCAGGCAAACCATTTGAATGGATGTCAATCCGACTTTACGAAAAATGCCTTGTTTCTACT  
>WSN\_PB1\_73  
AGCGAAAGCAGGCAAACCATTTGAATGGATGTCAATCCGACTTTCCCTTCATGAAAAATGCCTTGTTTCTACT  
>WSN\_PB1\_61  
AGCGAAAGCAGGCAAACCATTTGAATGGATGTCAATCCGACTTAAATGCCTTGTTTCTACT  
>WSN\_PB1\_63  
AGCGAAAGCAGGCAAACCATTTGAATGGATGTCAATCCGACTTAAAAATGCCTTGTTTCTACT  
>WSN\_PB1\_80  
AGCGAAAGCAGGCAAACCATTTGAATGGATGTCAATCCGAATTTAGCTTGTCTTCATGAAAAATGCCTTGTTTCTACT  
>WSN\_PB1\_47  
AGCGAAAGCAGGCAAACCATTTGAATGAAAAATGCCTTGTTTCTACT  
>WSN\_PB1\_48  
AGCGAAAGCAGGCAAACCATTTGAATGAAAAATGCCTTGTTTCTACT  
>WSN\_PB1\_64  
AGCGAAAGCAGGCAAACCATTTGAATGTAGCTTGTCTTCATGAAAAATGCCTTGTTTCTACT  
>WSN\_PB1\_62  
AGCGAAAGCAGGCAAACCATTTGATTAGCTTGTCTTCATGAAAAATGCCTTGTTTCTACT  
>WSN\_PB1\_43  
AGCGAAAGCAGGCAAACCATTTAAAAATGCCTTGTTTCTACT  
>WSN\_PB1\_40  
AGCGAAAGCAGGCAAACCATTTAAAAATGCCTTGTTTCTACT  
>WSN\_PB1\_50  
AGCGAAAGCAGGCAAACCATTTGTCTTCATGAAAAATGCCTTGTTTCTACT  
>WSN\_NS\_47  
AGCAAAAAGCAGGGTGACAAAGAAATAAAAACACCCTTGTTTCTACT  
>WSN\_NP\_72  
AGCAAAAAGCAGGGTAGATAATCACTCACAGAGTGACATCGAAATCATGGAGAAAAATACCCTTGTTTCTACT  
>WSN\_NP\_88  
AGCAAAAAGCAGGGTAGATAATCACTCACAGAGTGACATCGAAATCATGGGAGTACGACAATTAAGAAAAATACCCTTGTTTCTACT  
>WSN\_NP\_91  
AGCAAAAAGCAGGGTAGATAATCACTCACAGAGTGACATCGAAATAATGCAGAGGAGTACGACAATTAAGAAAAATACCCTTGTTTCTACT  
>WSN\_NP\_81

AGCAAAAGCAGGGTAGATAATCACTCACAGAGTGACATCGAAAGAGTACGACAATTAAGAAAAATACCCTTGTTTCTACT  
>WSN\_NP\_62  
AGCAAAAGCAGGGTAGATAATCACTCACAGAGTGACATCGGAAAAATACCCTTGTTTCTACT  
>WSN\_NP\_57  
AGCAAAAGCAGGGTAGATAATCACTCACAGAGTGACATCAATACCCTTGTTTCTACT  
>WSN\_NP\_58  
AGCAAAAGCAGGGTAGATAATCACTCACAGAGTGACATCAAATACCCTTGTTTCTACT  
>WSN\_NP\_81  
AGCAAAAGCAGGGTAGATAATCACTCACAGAGTGAATGCAGAGGAGTACGACAATTAAGAAAAATACCCTTGTTTCTACT  
>WSN\_NP\_62  
AGCAAAAGCAGGGTAGATAATCACTCATACGACAATTAAGAAAAATACCCTTGTTTCTACT  
>WSN\_NP\_49  
AGCAAAAGCAGGGTAGAGACAATTAAGAAAAATACCCTTGTTTCTACT  
>WSN\_NA\_72  
AGCAAAAGCAGGAGTTTAAATGAATCCAAACCAGAAAAAGTAGTTTGTTCAAAAAACTCCTTGTTTCTACT  
>WSN\_NA\_70  
AGCAAAAGCAGGAGTTTAAATGAATCCAAACCAGACAAGTAGTTTGTTCAAAAAACTCCTTGTTTCTACT  
>WSN\_NA\_69  
AGCAAAAGCAGGAGTTTAAATGAATCCAAATTGACAAGTAGTTTGTTCAAAAAACTCCTTGTTTCTACT  
>WSN\_NA\_45  
AGCAAAAGCAGGAGTTTAAATTTCAAAAAACTCCTTGTTTCTACT  
>WSN\_NA\_52  
AGCAAAAGCAGGAGTTTAAATTAGTTTGTTCAAAAAACTCCTTGTTTCTACT  
>WSN\_NA\_62  
AGCAAAAGCAGGAGTTTAAACCATTGACAAGTAGTTTGTTCAAAAAACTCCTTGTTTCTACT  
>WSN\_M\_70  
AGCGAAAGCAGGTAGATATTGAAAGATGAGTCTTCTAACCGAGGTCGTAAAAACTACCTTGTTTCTACT  
>WSN\_M\_47  
AGCGAAAGCAGGTAGATATTGAAAGATAAAACTACCTTGTTTCTACT  
>WSN\_HA\_52  
AGCAAAAGCAGGGGAAAATAAAAAACAACCAGAAAAACACCCTTGTTTCTACT  
>WSN\_HA\_49  
AGCAAAAGCAGGGGAAAATAAAAAACAAGAAAAACACCCTTGTTTCTACT  
>WSN\_HA\_48  
AGCAAAAGCAGGGGAAAATAAAAAACAGAAAAACACCCTTGTTTCTACT  
>WSN\_HA\_63  
AGCAAAAGCAGGGGAAAATAAAAAACATTTAGAAATATAAGGAAAAACACCCTTGTTTCTACT  
>WSN\_HA\_67  
AGCAAAAGCAGGGGAAAATAAAGATTAGGATTTAGAAATATAAGGAAAAACACCCTTGTTTCTACT  
>WSN\_HA\_61  
AGCAAAAGCAGGGGAAAATTAGGATTTAGAAATATAAGGAAAAACACCCTTGTTTCTACT  
>WSN\_HA\_58  
AGCAAAAGCAGGGGAATAGGATTTAGAAATATAAGGAAAAACACCCTTGTTTCTACT  
>WSN\_PB2\_57  
AGCGAAAGCAGGTCAATTATATTCAATATGGAAAGAAAAACGACCTTGTTTCTACT  
>WSN\_PB2\_69  
AGCGAAAGCAGGTCAATTATATTCAATATGGAAAGAGTGAATAGTTTAAAAACGACCTTGTTTCTACT  
>WSN\_PB2\_67  
AGCGAAAGCAGGTCAATTATATTCAATATGTAGTGCGAATAGTTTAAAAACGACCTTGTTTCTACT  
>WSN\_PB2\_51  
AGCGAAAGCAGGTCAATTATATTCAATATTA AAAACGACCTTGTTTCTACT  
>WSN\_PB2\_65  
AGCGAAAGCAGGTCAATTATATTCAATATAGTGCGAATAGTTTAAAAACGACCTTGTTTCTACT  
>WSN\_PB2\_59  
AGCGAAAGCAGGTCAATTATATTCAATACGAATAGTTTAAAAACGACCTTGTTTCTACT  
>WSN\_PB2\_62  
AGCGAAAGCAGGTCAATTATATTCAATGTGCGAATAGTTTAAAAACGACCTTGTTTCTACT  
>WSN\_PB2\_52  
AGCGAAAGCAGGTCAATTATATTCAATAGTTTAAAAACGACCTTGTTTCTACT  
>WSN\_PB2\_63  
AGCGAAAGCAGGTCAATTATATTCAATGTGCGAATAGTTTAAAAACGACCTTGTTTCTACT  
>WSN\_PB2\_44  
AGCGAAAGCAGGTCAATTATATTA AAAACGACCTTGTTTCTACT  
>WSN\_PB2\_60  
AGCGAAAGCAGGTCAATTATATTTAGTGCGAATAGTTTAAAAACGACCTTGTTTCTACT  
>WSN\_PB2\_46  
AGCGAAAGCAGGTCAATAATAGTTTAAAAACGACCTTGTTTCTACT  
>WSN\_PB2\_51  
AGCGAAAGCAGGTCAAGTGCGAATAGTTTAAAAACGACCTTGTTTCTACT  
>WSN\_PB1\_73

AGCGAAAGCAGGCAAACCATTTGAATGGATGTCAATCCGACTTTACTTTTCTAAAAAATGCCTTGTTTCTACT  
>WSN\_PB1\_69  
AGCGAAAGCAGGCAAACCATTTGAATGGATGTCAATCCGACTTTACTTTTAAAAATGCCTTGTTTCTACT  
>WSN\_PB1\_75  
AGCGAAAGCAGGCAAACCATTTGAATGGATGTCAATCCGACTTTACTCTTCATGAAAAAATGCCTTGTTTCTACT  
>WSN\_PB1\_65  
AGCGAAAGCAGGCAAACCATTTGAATGGATGTCAATCCGACTTTACAAAATGCCTTGTTTCTACT  
>WSN\_PB1\_64  
AGCGAAAGCAGGCAAACCATTTGAATGGATGTCAATCCGACTTTAAAAATGCCTTGTTTCTACT  
>WSN\_PB1\_61  
AGCGAAAGCAGGCAAACCATTTGAATGGATGTCAATCCGACTAAAATGCCTTGTTTCTACT  
>WSN\_PB1\_73  
AGCGAAAGCAGGCAAACCATTTGAATGGATGTCAATCCGACTGTCCTTCATGAAAAAATGCCTTGTTTCTACT  
>WSN\_PB1\_63  
AGCGAAAGCAGGCAAACCATTTGAATGGATGTCAATCCCATGAAAAAATGCCTTGTTTCTACT  
>WSN\_PB1\_60  
AGCGAAAGCAGGCAAACCATTTGAATGGATGTCAATCTGAAAAAATGCCTTGTTTCTACT  
>WSN\_PB1\_80  
AGCGAAAGCAGGCAAACCATTTGAATGGATGTCAATCTGAATTTAGCTTGTCCTTCATGAAAAAATGCCTTGTTTCTACT  
>WSN\_PB1\_63  
AGCGAAAGCAGGCAAACCATTTGAATGGATGTCACCTTCATGAAAAAATGCCTTGTTTCTACT  
>WSN\_PB1\_65  
AGCGAAAGCAGGCAAACCATTTGAATGGATGTCAGTCCTTCATGAAAAAATGCCTTGTTTCTACT  
>WSN\_PB1\_58  
AGCGAAAGCAGGCAAACCATTTGAATGGATGTCCATGAAAAAATGCCTTGTTTCTACT  
>WSN\_PB1\_52  
AGCGAAAGCAGGCAAACCATTTGAATGGATGTAAAAATGCCTTGTTTCTACT  
>WSN\_PB1\_63  
AGCGAAAGCAGGCAAACCATTTGAATGGACTTGTCCTTCATGAAAAAATGCCTTGTTTCTACT  
>WSN\_PB1\_59  
AGCGAAAGCAGGCAAACCATTTGAATGGGTCTTCATGAAAAAATGCCTTGTTTCTACT  
>WSN\_PB1\_52  
AGCGAAAGCAGGCAAACCATTTGAATGCATGAAAAAATGCCTTGTTTCTACT  
>WSN\_PB1\_48  
AGCGAAAGCAGGCAAACCATTTTCATGAAAAAATGCCTTGTTTCTACT  
>WSN\_PB1\_61  
AGCGAAAGCAGGCAAACCATTTTTAGCTTGTCCTTCATGAAAAAATGCCTTGTTTCTACT  
>WSN\_PB1\_57  
AGCGAAAGCAGGCAAACCATTAGCTTGTCCTTCATGAAAAAATGCCTTGTTTCTACT  
>WSN\_PB1\_60  
AGCGAAAGCAGGCAAACCTGAATTTAGCTTGTCCTTCATGAAAAAATGCCTTGTTTCTACT  
>WSN\_PB1\_63  
AGCGAAAGCAGGCAAACCTAGTGAATTTAGCTTGTCCTTCATGAAAAAATGCCTTGTTTCTACT  
>WSN\_PB1\_56  
AGCGAAAGCAGGCAAATTTAGCTTGTCCTTCATGAAAAAATGCCTTGTTTCTACT  
>WSN\_PA\_63  
AGCGAAAGCAGGTACTGATTCAAATGGAAGATTTTGTCCAAAAAAGTACCTTGTTTCTACT  
>WSN\_PA\_58  
AGCGAAAGCAGGTACTGATTCAAATGGAAGATTTAAAAAAGTACCTTGTTTCTACT  
>WSN\_PA\_53  
AGCGAAAGCAGGTACTGATTCAAATGGAAGATTAAGTACCTTGTTTCTACT  
>WSN\_PA\_63  
AGCGAAAGCAGGTACTGATTTATTTGCTATCCATACTGTCCAAAAAAGTACCTTGTTTCTACT  
>WSN\_PA\_44  
AGCGAAAGCAGGTACTGAGTCCAAAAAAGTACCTTGTTTCTACT  
>WSN\_NS\_59  
AGCAAAAGCAGGGTGACAAAGACATAATGGATCCAAACACTAACACCCTTGTTTCTACT  
>WSN\_NS\_60  
AGCAAAAGCAGGGTGACAAAGACATAATGGATCCAAATAAAAAACACCCTTGTTTCTACT  
>WSN\_NS\_52  
AGCAAAAGCAGGGTGACAAAGACATAATGTAAAAAACACCCTTGTTTCTACT  
>WSN\_NS\_48  
AGCAAAAGCAGGGTGACAAAGACATTAAAAAACACCCTTGTTTCTACT  
>WSN\_NS\_44  
AGCAAAAGCAGGGTGACAAAGACAAAAACACCCTTGTTTCTACT  
>WSN\_NS\_46  
AGCAAAAGCAGGGTGACAAAGACAAAAAACACCCTTGTTTCTACT  
>WSN\_NS\_45  
AGCAAAAGCAGGGTGACAAAGATAAAAAACACCCTTGTTTCTACT  
>WSN\_NS\_67

AGCAAAAGCAGGGTGACAAAGTCTCGTTTCAGCTTATTTAATAATAAAAAACACCCTTGTTTCTACT  
>WSN\_NS\_46  
AGCAAAAGCAGGGTGACAAATAATAAAAAACACCCTTGTTTCTACT  
>WSN\_NS\_63  
AGCAAAAGCAGGGTGACTCGTTTCAGCTTATTTAATAATAAAAAACACCCTTGTTTCTACT  
>WSN\_NP\_94  
AGCAAAAGCAGGGTAGATAATCACTCACAGAGTGACATCGAAATCATGGCGACCAAAGGCACCAAACGATCTTACAAATACCCT  
TGTTTCTACT  
>WSN\_NP\_71  
AGCAAAAGCAGGGTAGATAATCACTCACAGAGTGACATCGAAATCATGGCAAAAATACCCTTGTTTCTACT  
>WSN\_NP\_74  
AGCAAAAGCAGGGTAGATAATCACTCACAGAGTGACATCGAAATCATGGCAAGAAAAATACCCTTGTTTCTACT  
>WSN\_NP\_76  
AGCAAAAGCAGGGTAGATAATCACTCACAGAGTGACATCGAAATCATGGCTAAAGAAAAATACCCTTGTTTCTACT  
>WSN\_NP\_91  
AGCAAAAGCAGGGTAGATAATCACTCACAGAGTGACATCGAAATCATGGAGAGGAGTACGACAATTAAGAAAAATACCCTTGT  
TTCTACT  
>WSN\_NP\_64  
AGCAAAAGCAGGGTAGATAATCACTCACAGAGTGACATCGAAATAAAATACCCTTGTTTCTACT  
>WSN\_NP\_65  
AGCAAAAGCAGGGTAGATAATCACTCACAGAGTGACATCGAAAGAAAAATACCCTTGTTTCTACT  
>WSN\_NP\_63  
AGCAAAAGCAGGGTAGATAATCACTCACAGAGTGACATCGAGAAAAATACCCTTGTTTCTACT  
>WSN\_NP\_88  
AGCAAAAGCAGGGTAGATAATCACTCACAGAGTGACATCGCAATGCAGAGGAGTACGACAATTAAGAAAAATACCCTTGTTT  
TACT  
>WSN\_NP\_60  
AGCAAAAGCAGGGTAGATAATCACTCACAGAGTGACATCAAAAATACCCTTGTTTCTACT  
>WSN\_NP\_64  
AGCAAAAGCAGGGTAGATAATCACTCACAGAGTGACATCAAAGAAAAATACCCTTGTTTCTACT  
>WSN\_NP\_84  
AGCAAAAGCAGGGTAGATAATCACTCACAGAGTGACATATGCAGAGGAGTACGACAATTAAGAAAAATACCCTTGTTTCTACT  
>WSN\_NP\_59  
AGCAAAAGCAGGGTAGATAATCACTCACAGAGTGACAGAAAAATACCCTTGTTTCTACT  
>WSN\_NP\_71  
AGCAAAAGCAGGGTAGATAATCACTCACAGAGTGACAACGACAATTAAGAAAAATACCCTTGTTTCTACT  
>WSN\_NP\_64  
AGCAAAAGCAGGGTAGATAATCACTCACAGAGTGAAATTAAGAAAAATACCCTTGTTTCTACT  
>WSN\_NP\_71  
AGCAAAAGCAGGGTAGATAATCACTCACAGAGTGAGTACGACAATTAAGAAAAATACCCTTGTTTCTACT  
>WSN\_NP\_63  
AGCAAAAGCAGGGTAGATAATCACTCACAGAGTCAATTAAGAAAAATACCCTTGTTTCTACT  
>WSN\_NP\_50  
AGCAAAAGCAGGGTAGATAATCACTAAAGAAAAATACCCTTGTTTCTACT  
>WSN\_NP\_62  
AGCAAAAGCAGGGTAGATAATCACGAGTACGACAATTAAGAAAAATACCCTTGTTTCTACT  
>WSN\_NP\_45  
AGCAAAAGCAGGGTAGATAATCAGAAAAATACCCTTGTTTCTACT  
>WSN\_NP\_50  
AGCAAAAGCAGGGTAGATAATCATTAAAGAAAAATACCCTTGTTTCTACT  
>WSN\_NP\_42  
AGCAAAAGCAGGGTAGATAAGAAAAATACCCTTGTTTCTACT  
>WSN\_NP\_46  
AGCAAAAGCAGGGTAGATATTAAGAAAAATACCCTTGTTTCTACT  
>WSN\_NP\_46  
AGCAAAAGCAGGGTAGAAATTAAGAAAAATACCCTTGTTTCTACT  
>WSN\_NA\_86  
AGCAAAAGCAGGAGTTTAAATGAATCCAAACCAGAAAATAATAACCATTGGaTCgATCTGTATGCAAAAAACTCCTTGTTTCTACT  
>WSN\_NA\_64  
AGCAAAAGCAGGAGTTTAAATGAATCCAAACCAGAAAATAATAACAAAACCTCCTTGTTTCTACT  
>WSN\_NA\_66  
AGCAAAAGCAGGAGTTTAAATGAATCCAAACCAGATAGTTTGTTCAAAAAACCCTTGTTTCTACT  
>WSN\_NA\_67  
AGCAAAAGCAGGAGTTTAAATGAATCCAAACCAGTAGTTTGTTCAAAAAACCCTTGTTTCTACT  
>WSN\_NA\_68  
AGCAAAAGCAGGAGTTTAAATGAATCCAAACCACAAGTAGTTTGTTCAAAAAACCCTTGTTTCTACT  
>WSN\_NA\_69  
AGCAAAAGCAGGAGTTTAAATGAATCCAAACCACAAGTAGTTTGTTCAAAAAACCCTTGTTTCTACT  
>WSN\_NA\_72  
AGCAAAAGCAGGAGTTTAAATGAATCCAAACCATTGACAAGTAGTTTGTTCAAAAAACCCTTGTTTCTACT



AGCAAAAGCAGGGGAAAATAAAAAGATTTTCAGAAATATAAGGAAAAACACCCTTGTTTCTACT  
>WSN\_HA\_44  
AGCAAAAGCAGGGGAAAATAAGGAAAAACACCCTTGTTTCTACT  
>WSN\_HA\_60  
AGCAAAAGCAGGGGAAAATAGGATTTTCAGAAATATAAGGAAAAACACCCTTGTTTCTACT  
>WSN\_HA\_53  
AGCAAAAGCAGGGGAAAATCAGAAATATAAGGAAAAACACCCTTGTTTCTACT  
>WSN\_HA\_58  
AGCAAAAGCAGGGGAAAATGATTTTCAGAAATATAAGGAAAAACACCCTTGTTTCTACT  
>WSN\_HA\_41  
AGCAAAAGCAGGGGAAAAGGAAAAACACCCTTGTTTCTACT  
>WSN\_HA\_43  
AGCAAAAGCAGGGGAAAAAAGGAAAAACACCCTTGTTTCTACT  
>WSN\_HA\_50  
AGCAAAAGCAGGGGAAAAGAAATATAAGGAAAAACACCCTTGTTTCTACT  
>WSN\_HA\_64  
AGCAAAAGCAGGGGAAAAGATTAGGATTTTCAGAAATATAAGGAAAAACACCCTTGTTTCTACT

## Supplemental Fasta file 2. WSN mvRNA sequences.

>WSN\_NP\_61  
AGCAAAAAGCAGGGTAGATAATCACTCACAGAGTGACATAGAAAAATACCCTTGTTTCTACT

>WSN\_PB1\_57  
AGCGAAAAGCAGGCAAACCATTTGAATGGATTTTCATGAAAAAATGCCTTGTTTCTACT

>WSN\_PB1\_57  
AGCGAAAAGCAGGCAAACCATTTGAATGTCTTCATGAAAAAATGCCTTGTTTCTACT

>WSN\_PB1\_62  
AGCGAAAAGCAGGCAAACCATTTGAATGGATGTCAATCCGACTTAAATGCCTTGTTTCTACT

>WSN\_PB1\_66  
AGCGAAAAGCAGGCAAACCATTTGAATGTTTAGCTTGTCTTCATGAAAAAATGCCTTGTTTCTACT

>WSN\_NP\_58  
AGCAAAAAGCAGGGTAGATAATCACTCACAGAGTGACATCAAATACCCTTGTTTCTACT

>WSN\_HA\_60  
AGCAAAAAGCAGGGGAAATTAGGATTTAGAAATATAAGGAAAAACACCCTTGTTTCTACT

>WSN\_HA\_44  
AGCAAAAAGCAGGGGAATATAAGGAAAAACACCCTTGTTTCTACT

>WSN\_PB1\_69  
AGCGAAAAGCAGGCAAACCATTTGAATGGATGTTAGCTTGTCTTCATGAAAAAATGCCTTGTTTCTACT

>WSN\_PB1\_61  
AGCGAAAAGCAGGCAAACCATTTGAATGGTTGTCTTCATGAAAAAATGCCTTGTTTCTACT

>WSN\_NP\_63  
AGCAAAAAGCAGGGTAGATAATCACTCACAGAGTGACTTAAAGAAAAATACCCTTGTTTCTACT

>WSN\_NA\_70  
AGCAAAAAGCAGGAGTTTAAATGAATCCAAACCTGACAAGTAGTTTGTTCAAAAAATCCTTGTTTCTACT

>WSN\_NA\_62  
AGCAAAAAGCAGGAGTTTACACCATTGACAAGTAGTTTGTTCAAAAAATCCTTGTTTCTACT

>WSN\_PB1\_65  
AGCGAAAAGCAGGCAAACCATTTGAATGGATGTCAATCCGACTTAAAAAATGCCTTGTTTCTACT

>WSN\_PB1\_69  
AGCGAAAAGCAGGCAAACCATTTGAATGGATGTCAATCCGCTTCATGAAAAAATGCCTTGTTTCTACT

>WSN\_PB1\_48  
AGCGAAAAGCAGGCAAACCATTTGAATGAAAAAATGCCTTGTTTCTACT

>WSN\_PB1\_62  
AGCGAAAAGCAGGCAAACCATTTGAATAGCTTGTCTTCATGAAAAAATGCCTTGTTTCTACT

>WSN\_NP\_71  
AGCAAAAAGCAGGGTAGATAATCACTCACAGAGTGACATCGAAATCATGGCAAAAATACCCTTGTTTCTACT

>WSN\_NP\_76  
AGCAAAAAGCAGGGTAGATAATCACTCACAGAGTGACATCGAAATCATGGCTAAAGAAAAATACCCTTGTTTCTACT

>WSN\_NP\_64  
AGCAAAAAGCAGGGTAGATAATCACTCACAGAGTGACATCGAAATAAAAATACCCTTGTTTCTACT

>WSN\_NP\_55  
AGCAAAAAGCAGGGTAGATAATCACTCACAGAGAGAAAAATACCCTTGTTTCTACT

>WSN\_NP\_44  
AGCAAAAAGCAGGGTAGATTAAGAAAAAATACCCTTGTTTCTACT

>WSN\_HA\_58  
AGCAAAAAGCAGGGGAATAGGATTTAGAAATATAAGGAAAAACACCCTTGTTTCTACT

>WSN\_HA\_64  
AGCAAAAAGCAGGGGAATGAGATTAGGATTTAGAAATATAAGGAAAAACACCCTTGTTTCTACT

>WSN\_PB2\_80  
AGCGAAAAGCAGGTCAATTATATTCAATATGGAAGGCCATCAATTAGTGTGCAATAGTTTAAAAACGACCTTGTTTCTACT

>WSN\_PB1\_77  
AGCGAAAAGCAGGCAAACCATTTGAATGGATGTCAATCCGACTTTACTTTTCTCATGAAAAAATGCCTTGTTTCTACT

>WSN\_PB1\_65  
AGCGAAAAGCAGGCAAACCATTTGAATGGATGTCAATCCGACTTTACAAAATGCCTTGTTTCTACT

>WSN\_PB1\_64  
AGCGAAAAGCAGGCAAACCATTTGAATGGATGTCAATCCGACTTAAAAAATGCCTTGTTTCTACT

>WSN\_PB1\_68  
AGCGAAAAGCAGGCAAACCATTTGAATGGATGTCAATCCGACTTCATGAAAAAATGCCTTGTTTCTACT

>WSN\_PB1\_64  
AGCGAAAAGCAGGCAAACCATTTGAATGGATGTCAATCCGACTGAAAAAATGCCTTGTTTCTACT

>WSN\_PB1\_58  
AGCGAAAAGCAGGCAAACCATTTGAATGGATGTCAATCCAAAAATGCCTTGTTTCTACT

>WSN\_PB1\_64  
AGCGAAAAGCAGGCAAACCATTTGAATGGATGTCAATCCTCATGAAAAAATGCCTTGTTTCTACT

>WSN\_PB1\_68  
AGCGAAAAGCAGGCAAACCATTTGAATGGATGTCAATCCTCCTTCATGAAAAAATGCCTTGTTTCTACT

>WSN\_PB1\_60  
AGCGAAAAGCAGGCAAACCATTTGAATGGATGTCAATCTGAAAAAATGCCTTGTTTCTACT

>WSN\_PB1\_54



AGCGAAAGCAGGCAAACCATTTGAATGGATGTGAAAAATGCCTTGTTTCTACT  
>WSN\_PB1\_50  
AGCGAAAGCAGGCAAACCATTTGAATGGGAAAAATGCCTTGTTTCTACT  
>WSN\_PB1\_66  
AGCGAAAGCAGGCAAACCATTTGAATGGTTAGCTTGCTTCATGAAAAATGCCTTGTTTCTACT  
>WSN\_PB1\_49  
AGCGAAAGCAGGCAAACCATTTGAATTGAAAAATGCCTTGTTTCTACT  
>WSN\_PB1\_48  
AGCGAAAGCAGGCAAACCATTTGCATGAAAAATGCCTTGTTTCTACT  
>WSN\_PB1\_43  
AGCGAAAGCAGGCAAACCATTTAAAAATGCCTTGTTTCTACT  
>WSN\_PB1\_64  
AGCGAAAGCAGGCAAACCATGTGAATTTAGCTTGCTTCATGAAAAATGCCTTGTTTCTACT  
>WSN\_PB1\_61  
AGCGAAAGCAGGCAAACCTGAATTTAGCTTGCTTCATGAAAAATGCCTTGTTTCTACT  
>WSN\_PB1\_40  
AGCGAAAGCAGGCAAACCTGAAAAATGCCTTGTTTCTACT  
>WSN\_PB1\_56  
AGCGAAAGCAGGCAAACCTTTAGCTTGCTTCATGAAAAATGCCTTGTTTCTACT  
>WSN\_PA\_60  
AGCGAAAGCAGGTACTGATTCAAATGGCATACTGTCCAAAAAGTACCTTGTTTCTACT  
>WSN\_PA\_66  
AGCGAAAGCAGGTACTGATTCAAATGTGCTATCCATACTGTCCAAAAAGTACCTTGTTTCTACT  
>WSN\_NS\_80  
AGCAAAAAGCAGGGTGACAAAGACATAATGGATCCAACACTGTGTCAAGCTTTCAGATAAAAAACACCCTTGTTTCTACT  
>WSN\_NS\_56  
AGCAAAAAGCAGGGTGACAAAGACATAATGGATCTAAAAACACCCTTGTTTCTACT  
>WSN\_NS\_55  
AGCAAAAAGCAGGGTGACAAAGACATAATGTAATAAAAAACACCCTTGTTTCTACT  
>WSN\_NP\_66  
AGCAAAAAGCAGGGTAGATAATCACTCACAGAGTGACATCGTAAAGAAAAATACCCTTGTTTCTACT  
>WSN\_NP\_60  
AGCAAAAAGCAGGGTAGATAATCACTCACAGAGTGACATCAAAAATACCCTTGTTTCTACT  
>WSN\_NP\_65  
AGCAAAAAGCAGGGTAGATAATCACTCACAGAGTGACATCTAAAGAAAAATACCCTTGTTTCTACT  
>WSN\_NP\_66  
AGCAAAAAGCAGGGTAGATAATCACTCACAGAGTGACATCTTAAGAAAAATACCCTTGTTTCTACT  
>WSN\_NP\_74  
AGCAAAAAGCAGGGTAGATAATCACTCACAGAGTGACATCTACGACAATTAAGAAAAATACCCTTGTTTCTACT  
>WSN\_NP\_64  
AGCAAAAAGCAGGGTAGATAATCACTCACAGAGTGACATTAAGAAAAATACCCTTGTTTCTACT  
>WSN\_NP\_59  
AGCAAAAAGCAGGGTAGATAATCACTCACAGAGTGACAGAAAAATACCCTTGTTTCTACT  
>WSN\_NP\_72  
AGCAAAAAGCAGGGTAGATAATCACTCACAGAGTGACGTACGACAATTAAGAAAAATACCCTTGTTTCTACT  
>WSN\_NP\_70  
AGCAAAAAGCAGGGTAGATAATCACTCACAGAGTGATACGACAATTAAGAAAAATACCCTTGTTTCTACT  
>WSN\_NP\_57  
AGCAAAAAGCAGGGTAGATAATCACTCACAGAGTAAGAAAAATACCCTTGTTTCTACT  
>WSN\_NP\_44  
AGCAAAAAGCAGGGTAGATAATCACTAAATACCCTTGTTTCTACT  
>WSN\_NP\_49  
AGCAAAAAGCAGGGTAGATAATCACTAAGAAAAATACCCTTGTTTCTACT  
>WSN\_NP\_43  
AGCAAAAAGCAGGGTAGTTAAGAAAAATACCCTTGTTTCTACT  
>WSN\_NA\_75  
AGCAAAAAGCAGGAGTTTAAATGAATCCAAACCAGAAAATAAAGTAGTTTGTTCAAAAACTCCTTGTTTCTACT  
>WSN\_NA\_73  
AGCAAAAAGCAGGAGTTTAAATGAATCCAAACCAGAAAACAAGTAGTTTGTTCAAAAACTCCTTGTTTCTACT  
>WSN\_NA\_79  
AGCAAAAAGCAGGAGTTTAAATGAATCCAAACCAGAAAACATTGACAAGTAGTTTGTTCAAAAACTCCTTGTTTCTACT  
>WSN\_NA\_69  
AGCAAAAAGCAGGAGTTTAAATGAATCCAAACCAGAAAGTAGTTTGTTCAAAAACTCCTTGTTTCTACT  
>WSN\_NA\_61  
AGCAAAAAGCAGGAGTTTAAATGAATCCAAACCAGATGTTCAAAAAACTCCTTGTTTCTACT  
>WSN\_NA\_60  
AGCAAAAAGCAGGAGTTTAAATGAATCCAAACCAGTGTTCAAAAACTCCTTGTTTCTACT  
>WSN\_NA\_69  
AGCAAAAAGCAGGAGTTTAAATGAATCCAAACCAACAAGTAGTTTGTTCAAAAACTCCTTGTTTCTACT  
>WSN\_NA\_66

AGCAAAAGCAGGAGTTTAAATGAATCCAAAACAAGTAGTTTGTTCAAAAA ACTCCTTGTTTCTACT  
>WSN\_NA\_60  
AGCAAAAGCAGGAGTTTAAATGAATCCAATAGTTTGTTCAAAAA ACTCCTTGTTTCTACT  
>WSN\_NA\_63  
AGCAAAAGCAGGAGTTTAAACACCATTGACAAGTAGTTTGTTCAAAAA ACTCCTTGTTTCTACT  
>WSN\_NA\_62  
AGCAAAAGCAGGAGTTTTACCATTGACAAGTAGTTTGTTCAAAAA ACTCCTTGTTTCTACT  
>WSN\_NA\_63  
AGCAAAAGCAGGAGTCGTTCCACCATTGACAAGTAGTTTGTTCAAAAA ACTCCTTGTTTCTACT  
>WSN\_M\_71  
AGCGAAAGCAGGTAGATATTGAAAGATGAGTCTTCCATAGAGCTGGAGTAAAAA ACTACCTTGTTTCTACT  
>WSN\_M\_52  
AGCGAAAGCAGGTAGATATTGAAAGATGAGAAAAA ACTACCTTGTTTCTACT  
>WSN\_M\_48  
AGCGAAAGCAGGTAGATATTGAAAGATAAAAA ACTACCTTGTTTCTACT  
>WSN\_M\_47  
AGCGAAAGCAGGTAGATATTGAAATAAAAA ACTACCTTGTTTCTACT  
>WSN\_HA\_89  
AGCAAAAGCAGGGGAAAATAAAAAACAACCAAAATGAAGGCAGATTAGGATTT CAGAAATATAAGGAAAAACACCCTTGTTTCTACT  
T  
>WSN\_HA\_90  
AGCAAAAGCAGGGGAAAATAAAAAACAACCAAAATGAAGGCCTGAGATTAGGATTT CAGAAATATAAGGAAAAACACCCTTGTTTCTACT  
TACT  
>WSN\_HA\_50  
AGCAAAAGCAGGGGAAAATAAAAAACAACGAAAAACACCCTTGTTTCTACT  
>WSN\_HA\_63  
AGCAAAAGCAGGGGAAAATAAAAAACATTT CAGAAATATAAGGAAAAACACCCTTGTTTCTACT  
>WSN\_HA\_44  
AGCAAAAGCAGGGGAAAATAAAGAAAAACACCCTTGTTTCTACT  
>WSN\_HA\_41  
AGCAAAAGCAGGGGAAAATGAAAAACACCCTTGTTTCTACT  
>WSN\_HA\_65  
AGCAAAAGCAGGGGAAATGAGATTAGGATTT CAGAAATATAAGGAAAAACACCCTTGTTTCTACT  
>WSN\_HA\_66  
AGCAAAAGCAGGGGAAACTGAGATTAGGATTT CAGAAATATAAGGAAAAACACCCTTGTTTCTACT  
>WSN\_HA\_61  
AGCAAAAGCAGGGGAAGATTAGGATTT CAGAAATATAAGGAAAAACACCCTTGTTTCTACT

### Supplemental Fasta file 3. BM18 mvRNA sequences.

>BM18\_PB2,1,2325,35:(18+17)  
AGCRAAAGCAGGTCAATTACGACCTTGTTTCTACT  
>BM18\_M,1,1009,36:(17+19)  
AGCRAAAGCAGGTAGATAAACTACCTTGTTTCTACT  
>BM18\_M,1,1010,35:(17+18)  
AGCRAAAGCAGGTAGATAACTACCTTGTTTCTACT  
>BM18\_PB2,1,2324,36:(18+18)  
AGCRAAAGCAGGTCAATTAACGACCTTGTTTCTACT  
>BM18\_NS,1,872,36:(17+19)  
AGCRAAAGCAGGGTGACAAACACCCTTGTTTCTACT  
>BM18\_NP,1,1547,37:(18+19)  
AGCRAAAGCAGGGTAGATAAATACCCTTGTTTCTACT  
>BM18\_HA,1,1762,36:(19+17)  
AGCRAAAGCAGGGGAAAATACACCCTTGTTTCTACT  
>BM18\_NP,1,1541,41:(16+25)  
AGCRAAAGCAGGGTAGAAAAGAAAAATACCCTTGTTTCTACT  
>BM18\_NP,1,1547,35:(16+19)  
AGCRAAAGCAGGGTAGAAAATACCCTTGTTTCTACT  
>BM18\_PB2,1,2323,37:(18+19)  
AGCRAAAGCAGGTCAATTAACGACCTTGTTTCTACT  
>BM18\_PB2,1,2319,39:(16+23)  
AGCRAAAGCAGGTCAATTAACGACCTTGTTTCTACT  
>BM18\_HA,1,1761,37:(19+18)  
AGCRAAAGCAGGGGAAAATAACACCCTTGTTTCTACT  
>BM18\_NS,1,869,39:(17+22)  
AGCRAAAGCAGGGTGACAAAAACACCCTTGTTTCTACT  
>BM18\_NP,1,1545,39:(18+21)  
AGCRAAAGCAGGGTAGATAAAAAATACCCTTGTTTCTACT  
>BM18\_NP,1,1548,34:(16+18)  
AGCRAAAGCAGGGTAGAATACCCTTGTTTCTACT  
>BM18\_M,1,1008,37:(17+20)  
AGCRAAAGCAGGTAGATAAACTACCTTGTTTCTACT  
>BM18\_NS,1,871,37:(17+20)  
AGCRAAAGCAGGGTGACAAACACCCTTGTTTCTACT  
>BM18\_NS,1,873,35:(17+18)  
AGCRAAAGCAGGGTGACAACACCCTTGTTTCTACT  
>BM18\_HA,1,1760,38:(19+19)  
AGCRAAAGCAGGGGAAAATAAACACCCTTGTTTCTACT  
>BM18\_HA,1,1752,44:(17+27)  
AGCRAAAGCAGGGGAAAATAAGGAAAAACACCCTTGTTTCTACT  
>BM18\_NP,1,1546,36:(16+20)  
AGCRAAAGCAGGGTAGAAAATACCCTTGTTTCTACT  
>BM18\_M,1,1005,39:(16+23)  
AGCRAAAGCAGGTAGATAAAAACTACCTTGTTTCTACT  
>BM18\_NP,1,1546,38:(18+20)  
AGCRAAAGCAGGGTAGATAAAATACCCTTGTTTCTACT  
>BM18\_PB1,1,2324,36:(18+18)  
AGCRAAAGCAGGCAAACCAAATGCCTTGTTTCTACT  
>BM18\_HA,1,1757,41:(19+22)  
AGCRAAAGCAGGGGAAAATGAAAAACACCCTTGTTTCTACT  
>BM18\_NP,1,1540,43:(17+26)  
AGCRAAAGCAGGGTAGATAAAGAAAAATACCCTTGTTTCTACT  
>BM18\_NP,1,1544,38:(16+22)  
AGCRAAAGCAGGGTAGGAAAAATACCCTTGTTTCTACT  
>BM18\_PB1,1,2323,37:(18+19)  
AGCRAAAGCAGGCAAACCAAATGCCTTGTTTCTACT  
>BM18\_HA,1,1758,37:(16+21)  
AGCRAAAGCAGGGGAAAAAACACCCTTGTTTCTACT  
>BM18\_NP,1,1549,35:(18+17)  
AGCRAAAGCAGGGTAGATATACCCTTGTTTCTACT  
>BM18\_PB2,1,2322,38:(18+20)  
AGCRAAAGCAGGTCAATTAACGACCTTGTTTCTACT  
>BM18\_M,1,1011,34:(17+17)  
AGCRAAAGCAGGTAGATACTACCTTGTTTCTACT  
>BM18\_HA,1,1759,39:(19+20)  
AGCRAAAGCAGGGGAAAATAAACACCCTTGTTTCTACT  
>BM18\_PB2,1,2315,44:(17+27)  
AGCRAAAGCAGGTCAATTAGTTTAAAAACGACCTTGTTTCTACT  
>BM18\_NP,1,1543,39:(16+23)

AGCRAAAGCAGGGTAGAGAAAAATACCCTTGTTTCTACT  
>BM18\_HA,1,1758,38:(17+21)  
AGCRAAAGCAGGGGAAAAAACACCCTTGTTTCTACT  
>BM18\_HA,1,1754,42:(17+25)  
AGCRAAAGCAGGGGAAAAAGGAAAAACACCCTTGTTTCTACT  
>BM18\_PB1,1,2325,35:(18+17)  
AGCRAAAGCAGGCAAACCAATGCCTTGTTTCTACT  
>BM18\_NS,1,867,47:(23+24)  
AGCRAAAGCAGGGTGACAAAGACATAAAAAACACCCTTGTTTCTACT  
>BM18\_NS,1,870,38:(17+21)  
AGCRAAAGCAGGGTGACAAAAACACCCTTGTTTCTACT  
>BM18\_NS,1,874,34:(17+17)  
AGCRAAAGCAGGGTGACACACCCTTGTTTCTACT  
>BM18\_PB1,1,2321,39:(18+21)  
AGCRAAAGCAGGCAAACCAAAAAATGCCTTGTTTCTACT  
>BM18\_M,1,1007,38:(17+21)  
AGCRAAAGCAGGTAGATAAAAACTACCTTGTTTCTACT  
>BM18\_HA,1,1756,42:(19+23)  
AGCRAAAGCAGGGGAAAATGGAAAAACACCCTTGTTTCTACT  
>BM18\_NA,1,1439,36:(17+19)  
AGCRAAAGCAGGAGTTTAAAACTCCTTGTTTCTACT  
>BM18\_PB1,1,2322,38:(18+20)  
AGCRAAAGCAGGCAAACCAAAAAATGCCTTGTTTCTACT  
>BM18\_M,1,1004,41:(17+24)  
AGCRAAAGCAGGTAGATGTAAAAAACTACCTTGTTTCTACT  
>BM18\_NP,1,1544,40:(18+22)  
AGCRAAAGCAGGGTAGATGAAAAATACCCTTGTTTCTACT  
>BM18\_NP,1,1542,40:(16+24)  
AGCRAAAGCAGGGTAGAAGAAAAATACCCTTGTTTCTACT  
>BM18\_HA,1,1754,41:(16+25)  
AGCRAAAGCAGGGGAAAAGGAAAAACACCCTTGTTTCTACT  
>BM18\_PB2,1,2313,47:(18+29)  
AGCRAAAGCAGGTCAATTAATAGTTTAAAAACGACCTTGTTTCTACT  
>BM18\_M,1,1005,42:(19+23)  
AGCRAAAGCAGGTAGATGTTAAAAAACTACCTTGTTTCTACT  
>BM18\_NP,1,1543,41:(18+23)  
AGCRAAAGCAGGGTAGATAGAAAAATACCCTTGTTTCTACT  
>BM18\_PB2,1,2313,53:(24+29)  
AGCRAAAGCAGGTCAATTATATTCAATAGTTTAAAAACGACCTTGTTTCTACT  
>BM18\_PB2,1,2314,46:(18+28)  
AGCRAAAGCAGGTCAATTATAGTTTAAAAACGACCTTGTTTCTACT  
>BM18\_PB1,1,2322,43:(23+20)  
AGCRAAAGCAGGCAAACCATTTGAAAAATGCCTTGTTTCTACT  
>BM18\_PB1,1,2319,44:(21+23)  
AGCRAAAGCAGGCAAACCATTTGAAAAATGCCTTGTTTCTACT  
>BM18\_M,1,1006,43:(21+22)  
AGCRAAAGCAGGTAGATGTTGAAAAAACTACCTTGTTTCTACT  
>BM18\_PA,1,2212,48:(26+22)  
AGCRAAAGCAGGTACTGATTCAAATAAAAAAGTACCTTGTTTCTACT  
>BM18\_PA,1,2216,39:(21+18)  
AGCRAAAGCAGGTACTGATTCAAGTACCTTGTTTCTACT  
>BM18\_PA,1,2216,34:(16+18)  
AGCRAAAGCAGGTACTAAGTACCTTGTTTCTACT  
>BM18\_PA,1,2215,35:(16+19)  
AGCRAAAGCAGGTACTAAAGTACCTTGTTTCTACT  
>BM18\_PB2,1,2308,60:(26+34)  
AGCRAAAGCAGGTCAATTATATTCAATGTGCAATAGTTTAAAAACGACCTTGTTTCTACT  
>BM18\_HA,1,1746,52:(19+33)  
AGCRAAAGCAGGGGAAAATAGAAAATATAAGGAAAAACACCCTTGTTTCTACT  
>BM18\_HA,1,1741,57:(19+38)  
AGCRAAAGCAGGGGAAAATATTTAGAAAATATAAGGAAAAACACCCTTGTTTCTACT  
>BM18\_HA,1,1758,39:(18+21)  
AGCRAAAGCAGGGGAAAAAACACCCTTGTTTCTACT  
>BM18\_HA,1,1737,60:(18+42)  
AGCRAAAGCAGGGGAAAATAGGATTTAGAAAATATAAGGAAAAACACCCTTGTTTCTACT  
>BM18\_NS,1,869,43:(21+22)  
AGCRAAAGCAGGGTGACAAAGAAAAACACCCTTGTTTCTACT  
>BM18\_M,1,1000,46:(18+28)  
AGCRAAAGCAGGTAGATGTGGAGTAAAAAACTACCTTGTTTCTACT  
>BM18\_NA,1,1409,66:(17+49)

AGCRAAAGCAGGAGTTTCCATTACCATTGACAAGTAGTTTGTTCAAAAAAGTCTTGTCTACT  
>BM18\_NA,1,1423,51:(16+35)  
AGCRAAAGCAGGAGTTCAAGTAGTTTGTTCAAAAAAGTCTTGTCTACT  
>BM18\_NP,1,1545,38:(17+21)  
AGCRAAAGCAGGGTAGAAAAAATACCCTTGTCTACT  
>BM18\_NP,1,1541,42:(17+25)  
AGCRAAAGCAGGGTAGAAAAAAGAAAAATACCCTTGTCTACT  
>BM18\_PA,1,2207,52:(25+27)  
AGCRAAAGCAGGTACTGATTCAAATGTCCAAAAAGTACCTTGTCTACT  
>BM18\_PA,1,2211,43:(20+23)  
AGCRAAAGCAGGTACTGATTCAAAGTACCTTGTCTACT  
>BM18\_PB1,1,2320,45:(23+22)  
AGCRAAAGCAGGCAAACCATTTGGAAAAATGCCTTGTCTACT  
>BM18\_PB1,1,2302,58:(18+40)  
AGCRAAAGCAGGCAAACCATTTAGCTTGTCTTCATGAAAAATGCCTTGTCTACT  
>BM18\_HA,1,1755,43:(19+24)  
AGCRAAAGCAGGGGAAAAATAGAAAAACACCCTTGTCTACT  
>BM18\_HA,1,1757,38:(16+22)  
AGCRAAAGCAGGGGAAGAAAAACACCCTTGTCTACT  
>BM18\_NS,1,864,50:(23+27)  
AGCRAAAGCAGGGTGACAAAGACATAATAAAAAACACCCTTGTCTACT  
>BM18\_NS,1,869,42:(20+22)  
AGCRAAAGCAGGGTGACAAAAAACAACCCTTGTCTACT  
>BM18\_M,1,988,73:(33+40)  
AGCRAAAGCAGGTAGATGTTGAAAGATGAGTCTTCAACATAGAGCTGGAGTAAAAAAGTACCTTGTCTACT  
>BM18\_NA,1,1428,62:(32+30)  
AGCRAAAGCAGGAGTTTAAATGAATCCAAATCAGTTTGTTCAAAAAAGTCTTGTCTACT  
>BM18\_NA,1,1437,38:(17+21)  
AGCRAAAGCAGGAGTTTAAAAAAGTCTTGTCTACT  
>BM18\_NP,1,1547,58:(39+19)  
AGCRAAAGCAGGGTAGATAATCACTCACTGAGTGACATCAAATACCCTTGTCTACT  
>BM18\_NP,1,1546,56:(36+20)  
AGCRAAAGCAGGGTAGATAATCACTCACTGAGTGACAAAAATACCCTTGTCTACT  
>BM18\_NP,1,1535,59:(28+31)  
AGCRAAAGCAGGGTAGATAATCACTCACACAATTAAGAAAAATACCCTTGTCTACT  
>BM18\_NP,1,1540,42:(16+26)  
AGCRAAAGCAGGGTAGTAAAGAAAAATACCCTTGTCTACT  
>BM18\_PA,1,2213,42:(21+21)  
AGCRAAAGCAGGTACTGATTCAAAGTACCTTGTCTACT  
>BM18\_PA,1,2216,35:(17+18)  
AGCRAAAGCAGGTACTGAAGTACCTTGTCTACT  
>BM18\_PA,1,2217,33:(16+17)  
AGCRAAAGCAGGTACTAGTACCTTGTCTACT  
>BM18\_PB2,1,2312,48:(18+30)  
AGCRAAAGCAGGTCAATTGAATAGTTTAAAAACGACCTTGTCTACT  
>BM18\_PB2,1,2308,51:(17+34)  
AGCRAAAGCAGGTCAATTGTGCAATAGTTTAAAAACGACCTTGTCTACT  
>BM18\_PB1,1,2296,71:(25+46)  
AGCRAAAGCAGGCAAACCATTTGAATAGTGAATTTAGCTTGTCTTCATGAAAAAATGCCTTGTCTACT  
>BM18\_PB1,1,2324,40:(22+18)  
AGCRAAAGCAGGCAAACCATTTAAATGCCTTGTCTACT  
>BM18\_PB1,1,2321,43:(22+21)  
AGCRAAAGCAGGCAAACCATTTAAAAAATGCCTTGTCTACT  
>BM18\_HA,1,1758,46:(25+21)  
AGCRAAAGCAGGGGAAAAATAAAAAAACAACCCTTGTCTACT  
>BM18\_HA,1,1746,55:(22+33)  
AGCRAAAGCAGGGGAAAAATAAAGAAATATAAGAAAAACACCCTTGTCTACT  
>BM18\_HA,1,1731,66:(18+48)  
AGCRAAAGCAGGGGAAAAATGAGATTAGATTTCAGAAATATAAGAAAAACACCCTTGTCTACT  
>BM18\_HA,1,1757,39:(17+22)  
AGCRAAAGCAGGGGAAAGAAAAACACCCTTGTCTACT  
>BM18\_NS,1,873,43:(25+18)  
AGCRAAAGCAGGGTGACAAAGACATAACACCCTTGTCTACT  
>BM18\_NS,1,870,46:(25+21)  
AGCRAAAGCAGGGTGACAAAGACATAAAAAACACCCTTGTCTACT  
>BM18\_NS,1,858,57:(24+33)  
AGCRAAAGCAGGGTGACAAAGACATATTTAATAATAAAAAACACCCTTGTCTACT  
>BM18\_NS,1,872,42:(23+19)  
AGCRAAAGCAGGGTGACAAAGACAAACACCCTTGTCTACT  
>BM18\_NS,1,873,39:(21+18)

AGCRAAAGCAGGGTGACAAAGAACACCCTTGTTTCTACT  
>BM18\_NS,1,863,49:(21+28)  
AGCRAAAGCAGGGTGACAAAGAATAATAAAAAACACCCTTGTTTCTACT  
>BM18\_NS,1,866,43:(18+25)  
AGCRAAAGCAGGGTGACAAATAAAAAACACCCTTGTTTCTACT  
>BM18\_NS,1,866,42:(17+25)  
AGCRAAAGCAGGGTGACAATAAAAAACACCCTTGTTTCTACT  
>BM18\_M,1,1003,56:(31+25)  
AGCRAAAGCAGGTAGATGTTGAAAGATGAGTAGTAAAAAACTACCTTGTTTCTACT  
>BM18\_M,1,1008,48:(28+20)  
AGCRAAAGCAGGTAGATGTTGAAAGATGAAAACTACCTTGTTTCTACT  
>BM18\_M,1,1006,50:(28+22)  
AGCRAAAGCAGGTAGATGTTGAAAGATGAAAAAACTACCTTGTTTCTACT  
>BM18\_M,1,1005,49:(26+23)  
AGCRAAAGCAGGTAGATGTTGAAAGATAAAAAAACTACCTTGTTTCTACT  
>BM18\_M,1,1010,43:(25+18)  
AGCRAAAGCAGGTAGATGTTGAAAGAACTACCTTGTTTCTACT  
>BM18\_M,1,1006,47:(25+22)  
AGCRAAAGCAGGTAGATGTTGAAAGAAAAAACTACCTTGTTTCTACT  
>BM18\_M,1,1007,42:(21+21)  
AGCRAAAGCAGGTAGATGTTGAAAAAACTACCTTGTTTCTACT  
>BM18\_M,1,1002,46:(20+26)  
AGCRAAAGCAGGTAGATGTTGAGTAAAAAACTACCTTGTTTCTACT  
>BM18\_M,1,1003,44:(19+25)  
AGCRAAAGCAGGTAGATGTAGTAAAAAACTACCTTGTTTCTACT  
>BM18\_M,1,1000,45:(17+28)  
AGCRAAAGCAGGTAGATTGGAGTAAAAAACTACCTTGTTTCTACT  
>BM18\_M,1,1005,40:(17+23)  
AGCRAAAGCAGGTAGATTAAAAAAACTACCTTGTTTCTACT  
>BM18\_NA,1,1426,64:(32+32)  
AGCRAAAGCAGGAGTTTAAATGAATCCAAATCGTAGTTTGTTCAAAAAACTCCTTGTTTCTACT  
>BM18\_NA,1,1418,63:(23+40)  
AGCRAAAGCAGGAGTTTAAATGAATTGACAAGTAGTTTGTTCAAAAAACTCCTTGTTTCTACT  
>BM18\_NA,1,1420,58:(20+38)  
AGCRAAAGCAGGAGTTTAAATGACAAGTAGTTTGTTCAAAAAACTCCTTGTTTCTACT  
>BM18\_NA,1,1421,55:(18+37)  
AGCRAAAGCAGGAGTTTAGACAAGTAGTTTGTTCAAAAAACTCCTTGTTTCTACT  
>BM18\_NA,1,1438,37:(17+20)  
AGCRAAAGCAGGAGTTTAAAAAACTCCTTGTTTCTACT  
>BM18\_NP,1,1548,57:(39+18)  
AGCRAAAGCAGGGTAGATAATCACTCACTGAGTGACATCAATACCCTTGTTTCTACT  
>BM18\_NP,1,1545,60:(39+21)  
AGCRAAAGCAGGGTAGATAATCACTCACTGAGTGACATCAAAAATACCCTTGTTTCTACT  
>BM18\_NP,1,1547,57:(38+19)  
AGCRAAAGCAGGGTAGATAATCACTCACTGAGTGACATAAATACCCTTGTTTCTACT  
>BM18\_NP,1,1535,67:(36+31)  
AGCRAAAGCAGGGTAGATAATCACTCACTGAGTGACACAATTAAGAAAAATACCCTTGTTTCTACT  
>BM18\_NP,1,1548,39:(21+18)  
AGCRAAAGCAGGGTAGATAATAATACCCTTGTTTCTACT  
>BM18\_NP,1,1542,42:(18+24)  
AGCRAAAGCAGGGTAGATAAAGAAAAATACCCTTGTTTCTACT  
>BM18\_NP,1,1537,47:(18+29)  
AGCRAAAGCAGGGTAGATAATTAAGAAAAATACCCTTGTTTCTACT  
>BM18\_NP,1,1535,49:(18+31)  
AGCRAAAGCAGGGTAGATACAATTAAGAAAAATACCCTTGTTTCTACT  
>BM18\_NP,1,1520,62:(16+46)  
AGCRAAAGCAGGGTAGATGCAGAGGAGTACGACAATTAAGAAAAATACCCTTGTTTCTACT  
>BM18\_PA,1,2216,56:(38+18)  
AGCRAAAGCAGGTACTGATTCAAAATGGAAGACTTTGTAAGTACCTTGTTTCTACT  
>BM18\_PA,1,2216,54:(36+18)  
AGCRAAAGCAGGTACTGATTCAAAATGGAAGACTTTAAGTACCTTGTTTCTACT  
>BM18\_PA,1,2198,61:(25+36)  
AGCRAAAGCAGGTACTGATTCAAAATATCCATACTGTCCAAAAAAGTACCTTGTTTCTACT  
>BM18\_PA,1,2215,40:(21+19)  
AGCRAAAGCAGGTACTGATTCAAAGTACCTTGTTTCTACT  
>BM18\_PA,1,2209,43:(18+25)  
AGCRAAAGCAGGTACTGATCCAAAAAAGTACCTTGTTTCTACT  
>BM18\_PA,1,2212,39:(17+22)  
AGCRAAAGCAGGTACTGAAAAAAGTACCTTGTTTCTACT  
>BM18\_PB2,1,2312,64:(34+30)

AGCRAAAGCAGGTCAATTATATTCAATATGGAAAGAATAGTTTAAAAACGACCTTGTTTCTACT  
>BM18\_PB2,1,2313,56:(27+29)  
AGCRAAAGCAGGTCAATTATATTCAATAATAGTTTAAAAACGACCTTGTTTCTACT  
>BM18\_PB2,1,2320,48:(26+22)  
AGCRAAAGCAGGTCAATTATATTCAATAAAAAACGACCTTGTTTCTACT  
>BM18\_PB2,1,2305,63:(26+37)  
AGCRAAAGCAGGTCAATTATATTCAATAGTGTGCAATAGTTTAAAAACGACCTTGTTTCTACT  
>BM18\_PB2,1,2321,45:(24+21)  
AGCRAAAGCAGGTCAATTATATTCAAAAAACGACCTTGTTTCTACT  
>BM18\_PB2,1,2316,50:(24+26)  
AGCRAAAGCAGGTCAATTATATTCAAGTTTAAAAACGACCTTGTTTCTACT  
>BM18\_PB2,1,2320,41:(19+22)  
AGCRAAAGCAGGTCAATTATAAAAACGACCTTGTTTCTACT  
>BM18\_PB2,1,2293,67:(18+49)  
AGCRAAAGCAGGTCAATTATGGCCATCAATTAGTGTGCAATAGTTTAAAAACGACCTTGTTTCTACT  
>BM18\_PB2,1,2324,35:(17+18)  
AGCRAAAGCAGGTCAATAACGACCTTGTTTCTACT  
>BM18\_PB1,1,2319,75:(52+23)  
AGCRAAAGCAGGCAAACCATTTGAATGGATGTCAATCCGACTTTACTTTTCTGAAAAAATGCCTTGTTTCTACT  
>BM18\_PB1,1,2324,62:(44+18)  
AGCRAAAGCAGGCAAACCATTTGAATGGATGTCAATCCGACTTTAAATGCCTTGTTTCTACT  
>BM18\_PB1,1,2309,75:(42+33)  
AGCRAAAGCAGGCAAACCATTTGAATGGATGTCAATCCGACTTTGCCTTCATGAAAAAATGCCTTGTTTCTACT  
>BM18\_PB1,1,2324,48:(30+18)  
AGCRAAAGCAGGCAAACCATTTGAATGGATAAAATGCCTTGTTTCTACT  
>BM18\_PB1,1,2322,50:(30+20)  
AGCRAAAGCAGGCAAACCATTTGAATGGATAAAATGCCTTGTTTCTACT  
>BM18\_PB1,1,2318,50:(26+24)  
AGCRAAAGCAGGCAAACCATTTGAATATGAAAAAATGCCTTGTTTCTACT  
>BM18\_PB1,1,2319,45:(22+23)  
AGCRAAAGCAGGCAAACCATTTTAAAAAATGCCTTGTTTCTACT  
>BM18\_PB1,1,2299,64:(21+43)  
AGCRAAAGCAGGCAAACCATTTGAATTTAGCTTGTCTTCATGAAAAAATGCCTTGTTTCTACT  
>BM18\_PB1,1,2309,53:(20+33)  
AGCRAAAGCAGGCAAACCATTTGTCTTCATGAAAAAATGCCTTGTTTCTACT  
>BM18\_PB1,1,2320,40:(18+22)  
AGCRAAAGCAGGCAAACCGAAAAAATGCCTTGTTTCTACT  
>BM18\_PB1,1,2311,49:(18+31)  
AGCRAAAGCAGGCAAACCGTCCTTCATGAAAAAATGCCTTGTTTCTACT  
>BM18\_PB1,1,2297,63:(18+45)  
AGCRAAAGCAGGCAAACCATTTAGCTTGTCTTCATGAAAAAATGCCTTGTTTCTACT  
>BM18\_PB1,1,2317,42:(17+25)  
AGCRAAAGCAGGCAAACCATGAAAAAATGCCTTGTTTCTACT  
>BM18\_PB1,1,2290,69:(17+52)  
AGCRAAAGCAGGCAAACCAAAGTAGTGAATTTAGCTTGTCTTCATGAAAAAATGCCTTGTTTCTACT

#### Supplemental Fasta file 4. BM18 mvRNA sequences.

>BM18\_PB2,1,2325,35:(18+17)  
AGCRAAAGCAGGTCAATTACGACCTTGTTTCTACT  
>BM18\_M,1,1010,35:(17+18)  
AGCRAAAGCAGGTAGATAACTACCTTGTTTCTACT  
>BM18\_M,1,1009,36:(17+19)  
AGCRAAAGCAGGTAGATAAACTACCTTGTTTCTACT  
>BM18\_PB2,1,2324,36:(18+18)  
AGCRAAAGCAGGTCAATTAACGACCTTGTTTCTACT  
>BM18\_NS,1,872,36:(17+19)  
AGCRAAAGCAGGGTGACAAACACCCTTGTTTCTACT  
>BM18\_NP,1,1548,34:(16+18)  
AGCRAAAGCAGGGTAGAATACCCTTGTTTCTACT  
>BM18\_NP,1,1547,37:(18+19)  
AGCRAAAGCAGGGTAGATAAATACCCTTGTTTCTACT  
>BM18\_NP,1,1547,35:(16+19)  
AGCRAAAGCAGGGTAGAAATACCCTTGTTTCTACT  
>BM18\_HA,1,1762,36:(19+17)  
AGCRAAAGCAGGGGAAAATACACCCTTGTTTCTACT  
>BM18\_NS,1,873,35:(17+18)  
AGCRAAAGCAGGGTGACAACACCCTTGTTTCTACT  
>BM18\_NP,1,1545,39:(18+21)  
AGCRAAAGCAGGGTAGATAAAAATACCCTTGTTTCTACT  
>BM18\_HA,1,1752,44:(17+27)  
AGCRAAAGCAGGGGAAAATAAGGAAAAACACCCTTGTTTCTACT  
>BM18\_PB2,1,2323,37:(18+19)  
AGCRAAAGCAGGTCAATTAACGACCTTGTTTCTACT  
>BM18\_NS,1,871,37:(17+20)  
AGCRAAAGCAGGGTGACAAAACACCCTTGTTTCTACT  
>BM18\_HA,1,1761,37:(19+18)  
AGCRAAAGCAGGGGAAAATAACACCCTTGTTTCTACT  
>BM18\_NP,1,1546,36:(16+20)  
AGCRAAAGCAGGGTAGAAAATACCCTTGTTTCTACT  
>BM18\_HA,1,1757,41:(19+22)  
AGCRAAAGCAGGGGAAAATGAAAAACACCCTTGTTTCTACT  
>BM18\_NS,1,869,39:(17+22)  
AGCRAAAGCAGGGTGACAAAAACACCCTTGTTTCTACT  
>BM18\_NP,1,1546,38:(18+20)  
AGCRAAAGCAGGGTAGATAAAAATACCCTTGTTTCTACT  
>BM18\_PB2,1,2319,39:(16+23)  
AGCRAAAGCAGGTCAATTAACGACCTTGTTTCTACT  
>BM18\_M,1,1008,37:(17+20)  
AGCRAAAGCAGGTAGATAAACTACCTTGTTTCTACT  
>BM18\_HA,1,1760,38:(19+19)  
AGCRAAAGCAGGGGAAAATAAACACCCTTGTTTCTACT  
>BM18\_NP,1,1540,43:(17+26)  
AGCRAAAGCAGGGTAGATAAAGAAAAATACCCTTGTTTCTACT  
>BM18\_M,1,1005,39:(16+23)  
AGCRAAAGCAGGTAGATAAAAACTACCTTGTTTCTACT  
>BM18\_PB1,1,2324,36:(18+18)  
AGCRAAAGCAGGCAAACCAATGCCTTGTTTCTACT  
>BM18\_NP,1,1544,40:(18+22)  
AGCRAAAGCAGGGTAGATGAAAAATACCCTTGTTTCTACT  
>BM18\_NP,1,1549,35:(18+17)  
AGCRAAAGCAGGGTAGATATACCCTTGTTTCTACT  
>BM18\_M,1,1011,34:(17+17)  
AGCRAAAGCAGGTAGATACTACCTTGTTTCTACT  
>BM18\_PB1,1,2323,37:(18+19)  
AGCRAAAGCAGGCAAACCAAAATGCCTTGTTTCTACT  
>BM18\_HA,1,1758,37:(16+21)  
AGCRAAAGCAGGGGAAAAAACACCCTTGTTTCTACT  
>BM18\_NP,1,1543,41:(18+23)  
AGCRAAAGCAGGGTAGATAGAAAAATACCCTTGTTTCTACT  
>BM18\_NS,1,874,34:(17+17)  
AGCRAAAGCAGGGTGACACACCCTTGTTTCTACT  
>BM18\_PA,1,2216,34:(16+18)  
AGCRAAAGCAGGTACTAAGTACCTTGTTTCTACT  
>BM18\_HA,1,1756,42:(19+23)  
AGCRAAAGCAGGGGAAAATGAAAAACACCCTTGTTTCTACT  
>BM18\_PB2,1,2315,44:(17+27)



AGCRAAAGCAGGTCAATTAGTTTAAAAACGACCTTGTTTCTACT  
>BM18\_NS,1,870,38:(17+21)  
AGCRAAAGCAGGGTGACAAAAACACCCTTGTTTCTACT  
>BM18\_PB2,1,2322,38:(18+20)  
AGCRAAAGCAGGTCAATTAAAAACGACCTTGTTTCTACT  
>BM18\_PB1,1,2325,35:(18+17)  
AGCRAAAGCAGGCAAACCAATGCCTTGTTTCTACT  
>BM18\_HA,1,1758,38:(17+21)  
AGCRAAAGCAGGGGAAAAAAAACACCCTTGTTTCTACT  
>BM18\_HA,1,1754,42:(17+25)  
AGCRAAAGCAGGGGAAAAAGGAAAAACACCCTTGTTTCTACT  
>BM18\_HA,1,1759,39:(19+20)  
AGCRAAAGCAGGGGAAAATAAAACACCCTTGTTTCTACT  
>BM18\_NA,1,1439,36:(17+19)  
AGCRAAAGCAGGAGTTTAAAACTCCTTGTTTCTACT  
>BM18\_M,1,1007,38:(17+21)  
AGCRAAAGCAGGTAGATAAAAACTACCTTGTTTCTACT  
>BM18\_NA,1,1437,38:(17+21)  
AGCRAAAGCAGGAGTTTAAAAAACTCCTTGTTTCTACT  
>BM18\_PB1,1,2321,39:(18+21)  
AGCRAAAGCAGGCAAACCAAAAAATGCCTTGTTTCTACT  
>BM18\_NS,1,867,47:(23+24)  
AGCRAAAGCAGGGTGACAAAGACATAAAAAACACCCTTGTTTCTACT  
>BM18\_NP,1,1532,62:(28+34)  
AGCRAAAGCAGGGTAGATAATCACTCACACGACAATTAAGAAAAATACCCTTGTTTCTACT  
>BM18\_NP,1,1541,41:(16+25)  
AGCRAAAGCAGGGTAGAAAGAAAAATACCCTTGTTTCTACT  
>BM18\_PB1,1,2322,38:(18+20)  
AGCRAAAGCAGGCAAACCAAAAAATGCCTTGTTTCTACT  
>BM18\_NP,1,1531,52:(17+35)  
AGCRAAAGCAGGGTAGATACGACAATTAAGAAAAATACCCTTGTTTCTACT  
>BM18\_PA,1,2212,48:(26+22)  
AGCRAAAGCAGGTACTGATTCAAATAAAAAAGTACCTTGTTTCTACT  
>BM18\_HA,1,1752,59:(32+27)  
AGCRAAAGCAGGGGAAAATAAAAAACAACCAAAATAAGGAAAAACACCCTTGTTTCTACT  
>BM18\_HA,1,1754,41:(16+25)  
AGCRAAAGCAGGGGAAAAAGGAAAAACACCCTTGTTTCTACT  
>BM18\_PA,1,2211,43:(20+23)  
AGCRAAAGCAGGTACTGATTCAAATAAAAAAGTACCTTGTTTCTACT  
>BM18\_HA,1,1755,43:(19+24)  
AGCRAAAGCAGGGGAAAATAGGAAAAACACCCTTGTTTCTACT  
>BM18\_HA,1,1737,60:(18+42)  
AGCRAAAGCAGGGGAAAATAGGATTTAGGAAATATAAGGAAAAACACCCTTGTTTCTACT  
>BM18\_PB2,1,2313,47:(18+29)  
AGCRAAAGCAGGTCAATTAAATAGTTTAAAAACGACCTTGTTTCTACT  
>BM18\_NS,1,864,50:(23+27)  
AGCRAAAGCAGGGTGACAAAGACATAATAAAAAACACCCTTGTTTCTACT  
>BM18\_NP,1,1546,56:(36+20)  
AGCRAAAGCAGGGTAGATAATCACTCACTGAGTGACAAAATACCCTTGTTTCTACT  
>BM18\_NP,1,1535,59:(28+31)  
AGCRAAAGCAGGGTAGATAATCACTCACACAATTAAGAAAAATACCCTTGTTTCTACT  
>BM18\_PA,1,2212,44:(22+22)  
AGCRAAAGCAGGTACTGATTCAAATAAAAAAGTACCTTGTTTCTACT  
>BM18\_PA,1,2215,40:(21+19)  
AGCRAAAGCAGGTACTGATTCAAAGTACCTTGTTTCTACT  
>BM18\_PA,1,2208,47:(21+26)  
AGCRAAAGCAGGTACTGATTGTCGCAAAAAAGTACCTTGTTTCTACT  
>BM18\_PA,1,2215,35:(16+19)  
AGCRAAAGCAGGTACTAAAGTACCTTGTTTCTACT  
>BM18\_PB2,1,2313,53:(24+29)  
AGCRAAAGCAGGTCAATTATATTCAATAGTTTAAAAACGACCTTGTTTCTACT  
>BM18\_PB2,1,2314,46:(18+28)  
AGCRAAAGCAGGTCAATTATAGTTTAAAAACGACCTTGTTTCTACT  
>BM18\_PB2,1,2323,36:(17+19)  
AGCRAAAGCAGGTCAATAAACGACCTTGTTTCTACT  
>BM18\_HA,1,1748,61:(30+31)  
AGCRAAAGCAGGGGAAAATAAAAAACAACCAAAATAAGGAAAAACACCCTTGTTTCTACT  
>BM18\_HA,1,1738,66:(25+41)  
AGCRAAAGCAGGGGAAAATAAAAAACAGGATTTAGGAAATATAAGGAAAAACACCCTTGTTTCTACT  
>BM18\_HA,1,1758,39:(18+21)

AGCRAAAGCAGGGGAAAAAAAACACCCTTGTTTCTACT  
>BM18\_HA,1,1757,39:(17+22)  
AGCRAAAGCAGGGGAAAGAAAAACACCCTTGTTTCTACT  
>BM18\_HA,1,1738,58:(17+41)  
AGCRAAAGCAGGGGAAAAGGATTTTCAGAAATATAAGGAAAAACACCCTTGTTTCTACT  
>BM18\_NS,1,866,55:(30+25)  
AGCRAAAGCAGGGTGACAAAGACATAATGGAATAAAAAACACCCTTGTTTCTACT  
>BM18\_M,1,1011,35:(18+17)  
AGCRAAAGCAGGTAGATGACTACCTTGTTTCTACT  
>BM18\_NA,1,1428,57:(27+30)  
AGCRAAAGCAGGAGTTTAAATGAATCCAGTTTGTTCAAAAAATCCTTGTTTCTACT  
>BM18\_NA,1,1427,47:(16+31)  
AGCRAAAGCAGGAGTTTAGTTTGTTCAAAAAATCCTTGTTTCTACT  
>BM18\_NP,1,1548,57:(39+18)  
AGCRAAAGCAGGGTAGATAATCACTCACTGAGTGACATCAATACCCTTGTTTCTACT  
>BM18\_NP,1,1535,57:(26+31)  
AGCRAAAGCAGGGTAGATAATCACTCACAATTAAGAAAAATACCCTTGTTTCTACT  
>BM18\_PA,1,2207,52:(25+27)  
AGCRAAAGCAGGTACTGATTCAAATGTCCAAAAAAGTACCTTGTTTCTACT  
>BM18\_PA,1,2215,36:(17+19)  
AGCRAAAGCAGGTACTGAAAAGTACCTTGTTTCTACT  
>BM18\_PA,1,2214,36:(16+20)  
AGCRAAAGCAGGTACTAAAAGTACCTTGTTTCTACT  
>BM18\_PB2,1,2320,48:(26+22)  
AGCRAAAGCAGGTCAATTATTTCAATAAAAAACGACCTTGTTTCTACT  
>BM18\_PB1,1,2321,43:(22+21)  
AGCRAAAGCAGGCAAACCATTTAAAAAATGCCTTGTTTCTACT  
>BM18\_PB1,1,2319,44:(21+23)  
AGCRAAAGCAGGCAAACCATTTGAAAAAATGCCTTGTTTCTACT  
>BM18\_PB1,1,2320,39:(17+22)  
AGCRAAAGCAGGCAAACGAAAAAATGCCTTGTTTCTACT  
>BM18\_HA,1,1752,45:(18+27)  
AGCRAAAGCAGGGGAAAAATAAGGAAAAACACCCTTGTTTCTACT  
>BM18\_HA,1,1731,66:(18+48)  
AGCRAAAGCAGGGGAAAATGAGATTAGGATTTTCAGAAATATAAGGAAAAACACCCTTGTTTCTACT  
>BM18\_NS,1,869,52:(30+22)  
AGCRAAAGCAGGGTGACAAAGACATAATGGAAAAACACCCTTGTTTCTACT  
>BM18\_NS,1,872,40:(21+19)  
AGCRAAAGCAGGGTGACAAAGAAACACCCTTGTTTCTACT  
>BM18\_M,1,1004,41:(17+24)  
AGCRAAAGCAGGTAGATGTAAAAAATCCTTGTTTCTACT  
>BM18\_NA,1,1433,53:(28+25)  
AGCRAAAGCAGGAGTTTAAATGAATCCAGTTTCAAAAAATCCTTGTTTCTACT  
>BM18\_NP,1,1544,61:(39+22)  
AGCRAAAGCAGGGTAGATAATCACTCACTGAGTGACATCGAAAAATACCCTTGTTTCTACT  
>BM18\_NP,1,1550,37:(21+16)  
AGCRAAAGCAGGGTAGATAATTACCCTTGTTTCTACT  
>BM18\_NP,1,1529,55:(18+37)  
AGCRAAAGCAGGGTAGATAGTACGACAATTAAGAAAAATACCCTTGTTTCTACT  
>BM18\_NP,1,1544,38:(16+22)  
AGCRAAAGCAGGGTAGGAAAAAATACCCTTGTTTCTACT  
>BM18\_PA,1,2207,64:(37+27)  
AGCRAAAGCAGGTACTGATTCAAATGGAAGACTTTGTGTCCAAAAAAGTACCTTGTTTCTACT  
>BM18\_PA,1,2214,41:(21+20)  
AGCRAAAGCAGGTACTGATTCAAAGTACCTTGTTTCTACT  
>BM18\_PA,1,2217,33:(16+17)  
AGCRAAAGCAGGTACTAGTACCTTGTTTCTACT  
>BM18\_PB2,1,2324,35:(17+18)  
AGCRAAAGCAGGTCAATAACGACCTTGTTTCTACT  
>BM18\_PB1,1,2294,74:(26+48)  
AGCRAAAGCAGGCAAACCATTTGAATAGTAGTGAATTTAGCTTGTCTTCATGAAAAAATGCCTTGTTTCTACT  
>BM18\_PB1,1,2326,36:(20+16)  
AGCRAAAGCAGGCAAACCATATGCCTTGTTTCTACT  
>BM18\_PB1,1,2320,40:(18+22)  
AGCRAAAGCAGGCAAACCGAAAAAATGCCTTGTTTCTACT  
>BM18\_PB1,1,2324,35:(17+18)  
AGCRAAAGCAGGCAAACAAATGCCTTGTTTCTACT  
>BM18\_PB1,1,2323,36:(17+19)  
AGCRAAAGCAGGCAAACAAATGCCTTGTTTCTACT  
>BM18\_HA,1,1737,75:(33+42)

AGCRAAAGCAGGGGAAAATAAAAAACAACCAAATAGGATTTTCAGAAATATAAGGAAAAACACCCTTGTCTACT  
>BM18\_HA,1,1757,43:(21+22)  
AGCRAAAGCAGGGGAAAATAAGAAAAACACCCTTGTCTACT  
>BM18\_NS,1,868,63:(40+23)  
AGCRAAAGCAGGGTGACAAAGACATAATGGATTCTAACTAAAAACACCCTTGTCTACT  
>BM18\_NS,1,871,45:(25+20)  
AGCRAAAGCAGGGTGACAAAGACATAAAAAACACCCTTGTCTACT  
>BM18\_NS,1,862,53:(24+29)  
AGCRAAAGCAGGGTGACAAAGACATAATAAAAAACACCCTTGTCTACT  
>BM18\_NS,1,873,39:(21+18)  
AGCRAAAGCAGGGTGACAAAGAACACCCTTGTCTACT  
>BM18\_NS,1,869,43:(21+22)  
AGCRAAAGCAGGGTGACAAAGAAAAACACCCTTGTCTACT  
>BM18\_NS,1,837,73:(19+54)  
AGCRAAAGCAGGGTGACAAAGAACTTTCTCGTTTCAGCTTATTTAATAATAAAAAACACCCTTGTCTACT  
>BM18\_NS,1,875,33:(17+16)  
AGCRAAAGCAGGGTGACCACCCTTGTCTACT  
>BM18\_M,1,1006,69:(47+22)  
AGCRAAAGCAGGTAGATGTTGAAAGATGAGTCTTCTAACCGAGGTCGAAAAAACTACCTTGTCTACT  
>BM18\_M,1,1010,45:(27+18)  
AGCRAAAGCAGGTAGATGTTGAAAGATAACTACCTTGTCTACT  
>BM18\_M,1,1000,54:(26+28)  
AGCRAAAGCAGGTAGATGTTGAAAGATGGAGTAAAAAACTACCTTGTCTACT  
>BM18\_M,1,1002,43:(17+26)  
AGCRAAAGCAGGTAGATGAGTAAAAAACTACCTTGTCTACT  
>BM18\_NA,1,1429,56:(27+29)  
AGCRAAAGCAGGAGTTTAAATGAATCCGTTTGTCAA AAAACTCCTTGTCTACT  
>BM18\_NA,1,1438,36:(16+20)  
AGCRAAAGCAGGAGTTAAAAACTCCTTGTCTACT  
>BM18\_NP,1,1548,69:(51+18)  
AGCRAAAGCAGGGTAGATAATCACTCACTGAGTGACATCAAATCATGGCGAATACCCTTGTCTACT  
>BM18\_NP,1,1541,64:(39+25)  
AGCRAAAGCAGGGTAGATAATCACTCACTGAGTGACATCAAAGAAAAATACCCTTGTCTACT  
>BM18\_NP,1,1547,55:(36+19)  
AGCRAAAGCAGGGTAGATAATCACTCACTGAGTGACAAATACCCTTGTCTACT  
>BM18\_NP,1,1545,42:(21+21)  
AGCRAAAGCAGGGTAGATAATAAAAAATACCCTTGTCTACT  
>BM18\_NP,1,1550,34:(18+16)  
AGCRAAAGCAGGGTAGATTACCCTTGTCTACT  
>BM18\_NP,1,1542,42:(18+24)  
AGCRAAAGCAGGGTAGATAAGAAAAATACCCTTGTCTACT  
>BM18\_NP,1,1537,47:(18+29)  
AGCRAAAGCAGGGTAGATAATTAAAGAAAAATACCCTTGTCTACT  
>BM18\_NP,1,1535,49:(18+31)  
AGCRAAAGCAGGGTAGATACAATTAAAGAAAAATACCCTTGTCTACT  
>BM18\_NP,1,1539,43:(16+27)  
AGCRAAAGCAGGGTAGTTAAAGAAAAATACCCTTGTCTACT  
>BM18\_PA,1,2208,57:(31+26)  
AGCRAAAGCAGGTACTGATTCAAATGGAAGTCCAAAAAGTACCTTGTCTACT  
>BM18\_PA,1,2216,39:(21+18)  
AGCRAAAGCAGGTACTGATTCAAAGTACCTTGTCTACT  
>BM18\_PA,1,2213,41:(20+21)  
AGCRAAAGCAGGTACTGATTA AAAAGTACCTTGTCTACT  
>BM18\_PA,1,2217,34:(17+17)  
AGCRAAAGCAGGTACTGAGTACCTTGTCTACT  
>BM18\_PA,1,2213,37:(16+21)  
AGCRAAAGCAGGTACTAAAAAGTACCTTGTCTACT  
>BM18\_PB2,1,2323,48:(29+19)  
AGCRAAAGCAGGTCAATTATATTCAATATAAACGACCTTGTCTACT  
>BM18\_PB2,1,2306,61:(25+36)  
AGCRAAAGCAGGTCAATTATATTCAAGTGTCGAATAGTTTAAAAACGACCTTGTCTACT  
>BM18\_PB2,1,2314,48:(20+28)  
AGCRAAAGCAGGTCAATTATAGTTTAAAAACGACCTTGTCTACT  
>BM18\_PB2,1,2326,34:(18+16)  
AGCRAAAGCAGGTCAATTCCGACCTTGTCTACT  
>BM18\_PB2,1,2293,67:(18+49)  
AGCRAAAGCAGGTCAATTATGGCCATCAATTAGTGTCGAATAGTTTAAAAACGACCTTGTCTACT  
>BM18\_PB2,1,2325,34:(17+17)  
AGCRAAAGCAGGTCAATACGACCTTGTCTACT  
>BM18\_PB2,1,2308,51:(17+34)

AGCRAAAGCAGGTCAATTGTCGAATAGTTTAAAAACGACCTTGTTTCTACT  
>BM18\_PB2,1,2320,38:(16+22)  
AGCRAAAGCAGGTCAATAAAAAACGACCTTGTTTCTACT  
>BM18\_PB1,1,2314,73:(45+28)  
AGCRAAAGCAGGCAAACCATTTGAATGGATGTCAATCCGACTTTACTTCATGAAAAAATGCCTTGTTTCTACT  
>BM18\_PB1,1,2323,49:(30+19)  
AGCRAAAGCAGGCAAACCATTTGAATGGATAAAATGCCTTGTTTCTACT  
>BM18\_PB1,1,2321,47:(26+21)  
AGCRAAAGCAGGCAAACCATTTGAATAAAAAATGCCTTGTTTCTACT  
>BM18\_PB1,1,2320,41:(19+22)  
AGCRAAAGCAGGCAAACCAGAAAAAATGCCTTGTTTCTACT  
>BM18\_PB1,1,2325,34:(17+17)  
AGCRAAAGCAGGCAAACAATGCCTTGTTTCTACT  
>BM18\_PB1,1,2317,42:(17+25)  
AGCRAAAGCAGGCAAACCATGAAAAAATGCCTTGTTTCTACT

## Supplemental script – Python script for sliding window analysis

#Influenza virus RNA polymerase simulation script that searches for t-loops and checks up/down stream for intermol bp

#Uses Python 3.8, biopython, openpyxl, and Vienna RNA 2.47; side packages were installed with Anaconda3

#By AJ te Velthuis, Sept 2020

import sys

sys.path.append("/users/USER/opt/anaconda3/lib/python3.8/site-packages")

##input sequence. Paste sequence between quotation marks below.

RNA = "PASTE SEQUENCE HERE"

Name ="Template"

##output bubbles in txt file

f= open("deltaGvalues.txt","w+")

##specify polymerase properties

Footprint = 20

##specify NP footprint

NP = 24

TloopDuplex = 48

Duplex = int(TloopDuplex / 2)

##specify window and other comparisons

Uloop = "&" #Use & for co-fold to compute long-range interactions between upstream and downstream sequences.

Swindow = 1 #size of sliding window

#####

##invert input sequence to start at 3' end

NegRNA = RNA[::-1]

Length = len(NegRNA)

#####

##polymerase bubble properties

Bubble = Footprint + Duplex

##iteration start point of simulation; start at nt 2 otherwise downstream sequence is empty for co-fold  
i = 1

```
##end bubble sequence and add 1, because sequence count starts at 0
```

```
End = int((Length - Footprint + 1) / Swindow)
```

```
##find polymerase bubble sequence; allow for small 3' part to emerge, but
```

```
##then cap how long the emerging sequence can be by assuming that every 24 nt will be bound by NP
```

```
##unclear if NP binds in chunks or progressively. Assume that at least 24 nt are needed based on data from Ortin lab.
```

```
##stops 1 nt from end to avoid having no sequence in cofold
```

```
for i in range(1, End-1):
```

```
    if i <= NP:
```

```
        Upstream = i
```

```
        Downstream = 0
```

```
    else:
```

```
        Upstream = NP
```

```
        Downstream = i-NP
```

```
    #find upstream and downstream sequence of the bubble for intermolecular folding check
```

```
    Ahead = NegRNA[Footprint+i:Footprint+NP+i]
```

```
    Aheadinv = Ahead[::-1]
```

```
    #currently only takes 1 nt of downstream as 0 gives an error in cofold.
```

```
    Down = NegRNA[Downstream:i]
```

```
    Downinv = Down[::-1]
```

```
    ##find the two duplex ends and invert them so they are 5' to 3'
```

```
    if i <= Duplex:
```

```
        Prime3 = NegRNA[0:Upstream]
```

```
    else:
```

```
        Prime3 = NegRNA[i-Duplex:i]
```

```
    Prime3inv = Prime3[::-1]
```

```
    if i <= End:
```

```
        Prime5 = NegRNA[Footprint+i:Bubble+i]
```

```
    else:
```

```
        Prime5 = NegRNA[Footprint+i:Length]
```

```
    Prime5inv = Prime5[::-1]
```

```
    #compute A/U content of nucleotides in active site. Assume window of 6 before and after active site.  
    Various print options are inactivated, but can be used for checking if script works.
```

```
    ActiveSite = i + 16
```

```
    #print("location of bubble is ", i+1)
```

```
    #print("3 prime end 3' to 5' is ", Prime3)
```

```

#print("5 prime end 5' to 3' is ", Prime5inv)

ActiveSiteSeqUp = NegRNA[ActiveSite-1:ActiveSite+4]

ActiveSiteSeqDown = NegRNA[ActiveSite-5:ActiveSite]

#seq_up_list = list(ActiveSiteSeqUp)
seq_up_list = list(ActiveSiteSeqDown)
at_count_up = seq_up_list.count("a") + seq_up_list.count("t") + seq_up_list.count("A") +
seq_up_list.count("T") + seq_up_list.count("u") + seq_up_list.count("U")
at_frac_up = float(at_count_up)/5
total_at_up = 100 * at_frac_up

##saving the A/U content is inactivated below
#print(total_at_up)
#.f.write("%f\n" % (total_at_up))

##Vienna RNA package for RNA structure prediction
import RNA

Test = Prime3 + Uloop + Prime5

NegTest = Test[::-1]

#Output = (">" + Name + "_polymerase_bubble_number_%d\n" % (i+1))

##To write bubble sequence to .txt file
#.f.write(Output)
#.f.write(NegTest)
#.f.write("\r\n")

#use duplex fold to compute t-loop from Vienna package because it ignores intermol bp
duplex = RNA.duplexfold(Prime5inv, Prime3inv)

#print("%s\n%s [%6.2f]" % (NegTest, duplex.structure, duplex.energy))
##print("%6.2f" % (duplex.energy))

#use cofold from Vienna package to check for bp in sequence upstream and downstream of t-loop.
Various options can be checked separately, including just upstream seq, just downstream seq, or both seq
Other = Aheadinv + Uloop + Downinv
#Other = Aheadinv
#Other = Downinv

(ss, mfe_dimer) = RNA.cofold(Other)
#print("%s\n%s [%6.2f]" % (Other, ss, mfe_dimer))

DDeltaG = duplex.energy - mfe_dimer ##compute DeltaDeltaG

##check if deltaG of t-loop is lower than deltaG of other structures
if duplex.energy >= mfe_dimer:
    DeltaG = mfe_dimer * -1
#elif duplex.energy >= 0:
    #DeltaG = 0
else:
    #DeltaG = duplex.energy

```

```
DeltaG = duplex.energy

#DeltaG = mfe_dimer
#DeltaG = duplex.energy

#print(DeltaG)
#print(DDeltaG)
#print(duplex.energy)

#print("%s\n%s [ %6.2f ]" % (NegTest, ss, mfe))

##to write deltaG values to .txt file. Various options are available depending on what is being analyzed.
f.write("%f\n" % (duplex.energy))
#f.write("%f\n" % (DeltaG))
#f.write("%f\n" % (mfe_dimer))

#print(NegTest)
#print("-----")

i += Swindow

#####

##close .txt file that deltaG values were written to
f.close()
print ("Done %s" % (Name))
```
